Spike-frequency dependent inhibition and excitation of neural activity by high-frequency ultrasound

Martin Loynaz Prieto<sup>1</sup>, Kamyar Firouzi<sup>2</sup>, Butrus T. Khuri-Yakub<sup>2</sup>, Daniel V. Madison<sup>1</sup>, and Merritt Maduke<sup>1</sup>

<sup>1</sup>Department of Molecular and Cellular Physiology, and <sup>2</sup>E. L. Ginzton Laboratory, Stanford University

Condensed title: Spike-Rate-Dependent Neuromodulation by Ultrasound [50 characters or less]

**SUMMARY [40 words or less]** Prieto et al. describe how ultrasound can either inhibit or potentiate action potential firing in hippocampal pyramidal neurons and demonstrate that these effects can be explained by increased potassium conductance.

1 **ABSTRACT [300 words or less]**

2

3 Ultrasound can modulate action-potential firing *in vivo* and *in vitro*, but the mechanistic basis of

4 this phenomenon is not well understood. To address this problem, we used patch-clamp

5 recording to quantify the effects of focused, high-frequency (43 MHz) ultrasound on evoked

6 action potential firing in CA1 pyramidal neurons in acute rodent hippocampal brain slices. We

7 find that ultrasound can either inhibit or potentiate firing in a spike-frequency-dependent

8 manner: at low (near-threshold) input currents and low firing frequencies, ultrasound inhibits

9 firing, while at higher input currents and higher firing frequencies, ultrasound potentiates firing.

10 The net result of these two competing effects is that ultrasound increases the threshold current

11 for action potential firing, the slope of frequency-input curves, and the maximum firing

12 frequency. In addition, ultrasound slightly hyperpolarizes the resting membrane potential,

13 decreases action potential width, and increases the depth of the afterhyperpolarization. All of

14 these results can be explained by the hypothesis that ultrasound activates a sustained

15 potassium conductance. According to this hypothesis, increased outward potassium currents

16 hyperpolarize the resting membrane potential and inhibit firing at near-threshold input

17 currents, but potentiate firing in response to higher input currents by limiting inactivation of

18 voltage-dependent sodium channels during the action potential. This latter effect is a

19 consequence of faster action-potential repolarization, which limits inactivation of voltage-

20 dependent sodium channels, and deeper (more negative) afterhyperpolarization, which  
21 increases the rate of recovery from inactivation. Based on these results we propose that  
22 ultrasound activates thermosensitive and mechanosensitive two-pore-domain potassium (K2P)  
23 channels, through heating or mechanical effects of acoustic radiation force. Finite-element  
24 modelling of the effects of ultrasound on brain tissue suggests that the effects of ultrasound on  
25 firing frequency are caused by a small (less than 2°C) increase in temperature, with possible  
26 additional contributions from mechanical effects

## INTRODUCTION

1    Ultrasound can non-invasively modulate action potential activity in neurons *in vivo* and *in vitro*,  
2    with improved depth penetration and spatial resolution relative to other non-invasive  
3    neuromodulation modalities, and it may therefore become an important new technology in  
4    basic and clinical neuroscience (Fry et al., 1958; Gavrilov et al., 1996; Tufail et al., 2010;  
5    Bystritsky et al., 2011; Fomenko et al., 2018; Blackmore et al., 2019). Investigation of this  
6    phenomenon has predominantly focused on low-frequency ultrasound (defined here as less  
7    than 3 MHz, although there is no firmly defined boundary between “high” and “low” frequency  
8    in the neuromodulation field), but higher ultrasound frequencies have also been shown to  
9    modulate action potential firing *in vitro* (Menz et al., 2013; Menz et al., 2019) and to directly  
10    modulate ion channel activity in heterologous systems (Kubaneck et al., 2016; Prieto et al.,  
11    2018). The focus on lower frequency ultrasound is understandable, since envisioned clinical  
12    applications involving transcranial focused ultrasound have been a primary motivation for  
13    research on ultrasound neuromodulation, and loss of ultrasound power due to attenuation in  
14    the skull limits these applications to low frequency ultrasound. For applications in which  
15    transmission through the skull does not impose limits on frequency, such as *in vitro* studies,  
16    neuromodulation in the peripheral nervous system (Downs et al., 2018; Coterio et al., 2019;  
17    Zachs et al., 2019), neuromodulation using subcranial implants, or neuromodulation in  
18    experimental animal model systems involving craniotomies or acoustically transparent cranial  
19    windows, high frequencies have a distinct advantage in terms of the greater spatial resolution  
20    that can be achieved. Even for *in vivo* applications in human subjects, however, the spatial  
21    resolutions that can be achieved with low-frequency, transcranial ultrasound neuromodulation

22 are on the order of millimeters, making ultrasound neuromodulation superior in this respect to  
23 other, more established forms of non-invasive brain stimulation (Tyler et al., 2018).

24         These applications motivate investigation of the fundamental physical, cellular, and  
25 molecular mechanisms underlying neuromodulation, which are all not well understood for  
26 either high- or low-frequency ultrasound. It remains an open question to what extent these  
27 mechanisms overlap for high- and low-frequency ultrasound neuromodulation. In terms of the  
28 basic physical mechanism by which acoustic energy is transduced into effects on biological  
29 tissue, most proposed mechanisms for ultrasound neuromodulation involve either heating due  
30 to absorption of acoustic energy (Hand, 1998), mechanical effects of acoustic radiation force  
31 (Duck, 1998; Sarvazyan et al., 2010), or effects of cavitation (the nucleation, growth, oscillation,  
32 and sometimes collapse, of microscopic gas bubbles) (Leighton, 1998; Wu and Nyborg, 2008;  
33 Krasovitski et al., 2011; Plaksin et al., 2016). Of these, the first two increase with acoustic  
34 frequency, while the probability of cavitation decreases with acoustic frequency. There are also  
35 many unanswered questions at the cellular level. Both excitatory and inhibitory effects of  
36 ultrasound have been observed using direct or indirect measures of neural activity at the  
37 population level (Bystritsky et al., 2011; Blackmore et al., 2019), but it is unclear whether the  
38 direct effect of ultrasound at the cellular level is excitatory or inhibitory. Of course, the answer  
39 to this question could depend on any number of possible relevant biological and experimental  
40 variables, such as species, tissue, specific neural subtype, ultrasound stimulus parameters, or  
41 whether effects on intrinsic or evoked activity are measured. For example, a cellular-level  
42 excitatory effect, specific to GABAergic interneurons, could produce an inhibitory effect at the  
43 population level. This leads to the question of whether certain subpopulations of neurons are

44 more sensitive to ultrasound than others, and if so, what are the specific molecular  
45 mechanisms underlying the differences in sensitivity. Do certain ion channels respond directly  
46 to ultrasound? What biophysical properties might account for the sensitivity of these channels  
47 to ultrasound, and how might cell-type specific differences in the density and localization of  
48 these channels, and the way in which they interact with other ion channels to regulate action  
49 potential firing, produce differences in the response to ultrasound?

50         One reason there are so many outstanding questions regarding ultrasound  
51 neuromodulation is that patch-clamp recordings of the effects of ultrasound on action-potential  
52 firing in neurons have been unavailable. At low ultrasound frequencies, we (Prieto et al., 2018)  
53 and others (Tyler et al., 2008) have found that patch-clamp seals are extremely unstable in the  
54 presence of ultrasound at low frequencies, precluding detailed, mechanistic studies of  
55 ultrasound neuromodulation with this technique, which provides quantitative information on  
56 action-potential timing and dynamics unobtainable with other techniques. However, we have  
57 previously shown that stable patch-clamp recordings can be achieved using ultrasound at the  
58 frequency of 43 MHz (Prieto et al., 2018). Here, we use patch-clamp recording to measure the  
59 effects of ultrasound at 43 MHz and 50 W/cm<sup>2</sup> on action-potential firing in response to injected  
60 current in pyramidal neurons of the CA1 layer of the hippocampus in acute rodent brain slices.  
61 We find that ultrasound has a bidirectional, spike-frequency dependent effect on excitability,  
62 and that this and other observed neurophysiological effects of ultrasound can be explained by  
63 activation by ultrasound of a steady K<sup>+</sup> current, resembling that of two pore domain potassium  
64 channels (K2P channels).

65

## 66 MATERIALS AND METHODS

67 *Slice preparation.* Brain slices were prepared from male Sprague-Dawley rats, 35-50 days old.

68 Rats were anesthetized with isoflurane and decapitated, and the brain was immediately

69 removed and placed in ice-cold artificial cerebral spinal fluid (ACSF), bubbled with 95% O<sub>2</sub> and

70 5% CO<sub>2</sub>. The hippocampus was dissected out and placed on the slicing apparatus, consisting of a

71 manual micrometer and a gravity-driven vertical slicing mechanism, with the CA1 layer oriented

72 approximately parallel to the slicing blade. Slices (500 microns thick) were prepared and then

73 stored in a humidified chamber with an atmosphere of 95% O<sub>2</sub>/5% CO<sub>2</sub>, resting on a square of

74 filter paper placed on a dish of ACSF. Slices were used within 1-6 hours of slice preparation.

75 Animals were handled in accordance with protocols approved by Stanford University's

76 Institutional Animal Care and Use Committee.

77

78 *Ultrasound.* Continuous wave ultrasound at 43 MHz and 50 W/cm<sup>2</sup> was applied to brain slices

79 using a set-up similar to that we previously used for our experiments on cultured cells (Prieto et

80 al., 2018), except that the tissue was visualized with a dissecting microscope at low

81 magnification. The bottom of the experimental chamber was a 25-micron film of polystyrene,

82 plasma-treated with a Harrick plasma cleaner (Harrick Plasma, Ithaca, NY). Ultrasound was

83 transmitted from below (through the polystyrene film) with the sound beam perpendicular to

84 the bottom of the chamber. The 43 MHz transducer was a custom-built device, calibrated as

85 described previously (Prieto et al., 2013), excited using an ENI 403LA (37 dB) amplifier (ENI,

86 Rochester, NY). The focal volume of the transducer is approximately a cylinder 90 microns in

87 diameter by 500 microns long, and the focal distance is approximately 4.2 mm. The set-up was

88 based on the stage from a Zeiss Axioskop-2 microscope (Zeiss Microscopes, Jena, Germany),  
89 with the housing for the sub-stage condenser modified to accommodate the transducer, such  
90 that the position of the transducer could be adjusted using the controls for alignment of the  
91 condenser, and the position of the tissue sample relative to the transducer could be adjusted  
92 with the microscope stage. The transducer was coupled to the polystyrene film at the bottom  
93 of the experimental chamber using a small volume of distilled water held in place by a rubber  
94 O-ring attached to the tip of the transducer with silicone grease. The focal volume of the  
95 transducer was aligned along the z-axis using a pulse-echo protocol, adjusting the height of the  
96 transducer to maximize the echo signal from the bottom of the empty chamber. The focus was  
97 aligned in the x-y plane by adding to the chamber a small volume of ACSF, barely sufficient to  
98 cover the bottom of the chamber, such that a thin layer of solution was spread over the bottom  
99 of the chamber. Ultrasound pulses, one second in length, were then applied, raising a mound of  
100 fluid at the focus of the transducer (due to the radiation force produced by reflection of the  
101 acoustic wave at the interface between the solution and the air above it (Duck, 1998)). The  
102 mound of fluid was then aligned in the x-y plane to the center of a reticle in one eyepiece of the  
103 dissecting microscope, and, after adding additional ACSF and the tissue sample to the chamber,  
104 the center of the reticle was aligned with the region of the tissue targeted for patch-clamp  
105 recording. The ultrasound intensity ( $50 \text{ W/cm}^2$ ) is the spatial peak, pulse average intensity for  
106 the free field. The interval between ultrasound applications was at least 12 seconds.

107

108 *Electrophysiology.* Current clamp recordings were performed using an Axon Instruments

109 Axoclamp-2B amplifier operating in “Bridge” mode and Digidata 1330A digitizer with pClamp



110 software (Molecular Devices, Sunnyvale, CA), except for the preliminary experiments in  
111 Supplemental Figure 1, which were performed with an Axon Instruments Axopatch 200B  
112 amplifier (Molecular Devices, Sunnyvale, CA). Patch-clamp recording was performed using a  
113 “blind-patch” approach (Blanton et al., 1989; Malinow and Tsien, 1990; Castaneda-Castellanos  
114 et al., 2006), in which the recording pipette was positioned above the CA1 layer of the  
115 hippocampus, as identified visually at low magnification, and then slowly lowered into the  
116 tissue while applying positive pressure to the pipette and monitoring the pipette tip resistance  
117 in voltage-clamp mode. In the blind-patch approach, a small decrease in tip resistance is used to  
118 indicate possible contact of the pipette tip with a neuron in the absence of the usual visual  
119 cues. Typically, the first two instances of possible cell contact were not used, to avoid patching  
120 on cells at the surface of the tissue that may have been damaged during the slicing procedure.  
121 Gigaseals and the subsequent whole-cell recording configuration were obtained following the  
122 standard procedure in voltage-clamp mode before switching to current-clamp mode. In most  
123 experiments, slices were held in place with a Warner Instruments RC-22 slice anchor (Harvard  
124 Bioscience, Hamden, CT); the experiments in Supplemental Figure 1 and some of the  
125 experiments in Figure 1E were performed without a slice anchor. No obvious effects of the slice  
126 anchor on the ultrasound response were noted. Series resistance, monitored and compensated  
127 throughout the recording, was between 30 and 100 M $\Omega$ . All of the neurons used for  
128 experiments could be unambiguously identified as pyramidal cells by their distinct adaptive  
129 firing patterns in response to 2-s current steps. Current records were low-pass filtered at 10 kHz  
130 and sampled at 100 kHz. Brain slices were continuously perfused with ACSF (in mM: 119 NaCl,  
131 2.5 KCl, 1.3 MgSO<sub>4</sub>, 2.5 CaCl<sub>2</sub>, 1 NaH<sub>2</sub>PO<sub>4</sub>, 26.2 NaHCO<sub>3</sub>, 11 glucose), bubbled with 95% O<sub>2</sub>/5%

132 CO<sub>2</sub>, at ~100-250 mL/hour. The internal solution was (in mM): 126 K-gluconate, 4 KCl, 10 HEPES,  
133 4 Mg-ATP, 0.3 Na<sub>2</sub>GTP, 10 Na-phosphocreatine, 10 sucrose, and 50 U/mL creatine  
134 phosphokinase (porcine), pH 7.2 (KOH). This internal solution contains an ATP-regenerating  
135 system (phosphocreatine and creatine phosphokinase) because we found that the strength of  
136 the response to ultrasound was unstable, gradually declining over the course of a recording  
137 unless the ATP-regenerating system was included (Supplemental Figure 2). Na-phosphocreatine  
138 was obtained from Abcam and creatine phosphokinase was obtained from EMD Millipore. All  
139 other salts and chemicals were obtained from either Sigma-Aldrich or Fisher Scientific. (For  
140 some of the preliminary recordings shown in Figure 1E, the creatine phosphokinase was  
141 omitted from the internal solution, or a different internal solution, containing 120 K-gluconate,  
142 40 HEPES, 5 MgCl<sub>2</sub>, 0.3 Na<sub>2</sub>GTP, 2 Na<sub>2</sub>ATP, pH 7.2 (KOH) was used. Creatine phosphokinase was  
143 also omitted for the experiments in Supplemental Figure 4). Other than the reduction of the  
144 ultrasound response over time in the absence of creatine phosphokinase, no obvious  
145 differences in recordings with different internal solutions were noted.) Because creatine  
146 phosphokinase increases the viscosity of the solution, making it difficult to obtain gigaseals, a  
147 small volume of internal solution without the enzyme was added to the tip of the pipette  
148 (enough to fill approximately the first 3 mm of the tip) before back-filling the pipette with the  
149 enzyme-containing solution. Pipettes were pulled from thick walled glass and had resistances  
150 between 5 and 10 MΩ. Recordings were performed at room temperature (21-23°C), except for  
151 the experiments in Supplemental Figure 4, which were performed at near physiological  
152 temperature (30°C). For these experiments, the temperature of the external solution was  
153 regulated and monitored with a Warner Instruments CL-100 bipolar temperature controller

154 equipped with a SC-20 in-line heater/cooler and a thermistor (Warner Instruments, Hamden,  
155 CT). The external solution was heated to 35-37°C while being bubbled with 95% O<sub>2</sub>/5% CO<sub>2</sub> and  
156 then passed through the heater/cooler and cooled to achieve the target temperature of 30°C in  
157 the bath solution. (The external solution was cooled rather than heated to avoid loss of oxygen  
158 tension and formation of gas bubbles due to heating of oxygen-saturated solution.)

159  
160 *Data analysis.* Current records were analyzed in Igor Pro (Wavemetrics, Lake Oswego, OR) with  
161 user-written procedures. Action-potential threshold was defined as the point at which the first  
162 derivative of the voltage reached 4% of its peak value during the rising phase of the action  
163 potential. This quantitative criterion was previously found to correspond with action-potential  
164 thresholds as identified visually (Khaliq and Bean, 2010; Yamada-Hanff and Bean, 2015), and we  
165 found that it also works well with our data, using phase plots to visually confirm the threshold  
166 value. Action-potential height was defined as the difference between the action-potential peak  
167 and the action-potential threshold voltage. Action-potential width was measured at 50% of  
168 action potential height defined in this manner. Threshold current levels for action-potential  
169 firing were estimated based on a series of current steps in 10-pA increments. Frequency-input  
170 plots and action-potential parameters (height, width, latency, and interspike intervals) were  
171 determined from the average values of at least 3 trials each for the control and ultrasound  
172 conditions. Frequency-input trials were performed alternatingly for the control and ultrasound  
173 conditions, with the first condition tested varying randomly on a cell-by-cell basis.  
174 Average traces for analysis of the effects of ultrasound on membrane resting potential and  
175 membrane capacitance were derived from at least 3 voltage traces.

176 Statistical significance was assessed using paired or unpaired two-tailed Student's t-tests, with P  
177 < 0.05 defined as significant. Statistical analysis was performed in Microsoft Excel.

178

179 *Finite-element simulations.* Finite-element were performed in COMSOL (COMSOL Inc., Palo  
180 Alto, CA, USA). The simulation domain had radially symmetric geometry and was 6 mm in the  
181 axial direction. The simulation domain contained four layers of different materials: a lower layer  
182 of water (4.2 mm thick in the axial direction), followed by a layer of polystyrene (25 microns  
183 thick), followed by a layer of brain tissue (500 microns thick), followed by an upper layer of  
184 water (1.275 mm thick). The width of the simulation domain in the axial direction was 1 mm  
185 (for simulation for acoustic pressure and heating) or 5 mm (for simulation of mechanical  
186 deformation) in the axial direction. A 940-micron diameter by 100-micron height arc on the  
187 lower axial boundary of the simulation domain represented the quartz lens of the transducer.

188 Simulations of acoustic pressure, heating, and static displacement in response to  
189 radiation force were performed as described previously (Prieto et al., 2018). For simulation of  
190 dynamic tissue displacement in response to radiation force, the brain slice was modeled as a  
191 incompressible, linear viscoelastic material (Calhoun et al., 2019), characterized by Young's  
192 modulus, Poisson's ratio, and shear viscosity, loaded by the fluid layer above it. The polystyrene  
193 was modeled as a linear elastic material, because we determined in a series of simulations that  
194 including viscosity of the polystyrene had no effect on the tissue displacement. A time step of  
195 0.1 ms was used for simulation of the dynamic tissue displacement. Material properties used  
196 for water, polystyrene, and brain tissue used in the simulation and sources for these values are

197 given in Table 1. Additional details on mesh size, boundary conditions, and solver configurations  
198 are available in Prieto et al. (2018).

199

## 200 **SUMMARY OF SUPPLEMENTAL MATERIAL**

201 Supplemental materials include four figures showing: the effect of ultrasound at different  
202 intensities on action potential firing frequency (Supplemental Figure 1); stabilization of the  
203 response to ultrasound by an ATP-regenerating system in the internal solution (Supplemental  
204 Figure 2); effect of ultrasound on action potential height (Supplemental Figure 3); and the  
205 effects of ultrasound on action potential firing and waveform at near physiological temperature  
206 (30°C) (Supplemental Figure 4).

207

## 208 **RESULTS**

209 We measured the effects of ultrasound on action-potential firing in hippocampal CA1 pyramidal  
210 cells using the set-up shown in Figure 1A (described in *Materials and Methods*). Throughout the  
211 experiments reported here, ultrasound was applied at 43 MHz and 50 W/cm<sup>2</sup> as a 1-s,  
212 continuous-wave pulse. In an initial exploration of the effects of intensity on the ultrasound  
213 response, we determined that 50 W/cm<sup>2</sup> had a sufficiently robust effect on firing frequency to  
214 permit quantitative investigation of this effect (Supplemental Figure 1), but we did not perform  
215 a detailed investigation of the intensity dependence. We chose to use continuous-wave  
216 ultrasound (without additional low-frequency modulation within the pulse) because  
217 continuous-wave ultrasound was previously found to be optimal for ultrasound  
218 neuromodulation of retinal ganglion cells at 43 MHz (Menz et al., 2013). With these ultrasound

219 parameters, we found robust, reproducible inhibition of action-potential firing by ultrasound  
220 using the protocol illustrated in Figure 1B. In these experiments, a current-injection amplitude  
221 sufficient to induce firing at an average frequency of ~4-12 Hz during the first 500 ms of the  
222 current step (corresponding to the overlap between the ultrasound stimulus and current step)  
223 was used. This range of firing frequencies is physiologically relevant and sufficient to detect  
224 either inhibition or potentiation of firing. With these experimental conditions, we established  
225 that the response to ultrasound is highly reproducible, both on a trial-by-trial basis within the  
226 same cell (Figure 1C-D), and between cells, with similar effects seen in over fifty cells (Figure  
227 1E). In addition, the response to ultrasound was stable over the course of recordings lasting  
228 over 30 minutes (Figure 1F, Supplemental Figure 2); in a few cases where the patch seal lasted  
229 for over 90 minutes, the ultrasound response remained stable.

230  
231 *Effects of ultrasound on frequency-input curves.* To explore the effects of ultrasound on  
232 excitability over a wider range of firing frequencies, we generated frequency-input (f-i) curves  
233 comparing average firing frequencies as a function of input current in the presence and  
234 absence of ultrasound. An example f-i curve generated with the protocol illustrated in Figure 1B  
235 is shown in Figure 2A, along with example voltage traces in Figure 2B. The average spike  
236 frequency during the first 500 ms of the current step was compared to the spike frequency in  
237 the same time window in the absence of ultrasound. To compare the effects of ultrasound  
238 across neurons, we converted the f-i curves into plots of the relative increase or decrease in  
239 firing frequency as a function of the input current (Figure 2C-D). These data reveal two distinct  
240 regimes with contrasting inhibitory and excitatory ultrasound effects. At relatively low input

241 currents, near the threshold for action-potential firing under this current stimulation protocol,  
242 ultrasound decreases the average firing frequency; while at relatively high input currents, well  
243 above the action-potential threshold, ultrasound increases the average firing frequency.  
244 Between these two regimes, there is a transitional region where there is little or no effect on  
245 average firing frequency, presumably due to the balance between competing inhibitory and  
246 excitatory effects. Other notable effects of ultrasound on the f-i curves are an increase in the  
247 threshold current for action-potential firing, an increase in the slope of the f-i relationship in  
248 the approximately linear region of the f-i curve, and an increase in the maximum firing  
249 frequency in the sublinear “plateau” region of the curve (Figure 2A). The mean ( $\pm$  SEM) slope of  
250 linear region of the f-i curve increased from  $0.108 \pm 0.007$  Hz/pA in the control condition to  
251  $0.145 \pm 0.012$  Hz/pA in the ultrasound condition; and the mean maximum firing frequency  
252 increased from  $23 \pm 1$  Hz in the control condition to  $30 \pm 2$  Hz/pA in the ultrasound condition (N  
253 = 9).

254 Action-potential firing behavior is determined by the interaction between numerous  $K^+$ ,  
255  $Na^+$ , and other ionic currents (Madison and Nicoll, 1984; Bean, 2007). Some of these currents  
256 are clearly identified with specific ion channel subtypes, while the molecular identity of others  
257 is still uncertain. Thus, f-i curves are a complicated function of the density, localization,  
258 conductance, and kinetic properties of these channels/currents. Some currents inactivate  
259 relatively rapidly and only influence firing frequency during the initial response to a sustained  
260 depolarizing current step, while others show slow, voltage-dependent activation, and only  
261 influence firing frequency late in a current step; still other currents can influence firing  
262 frequency throughout a sustained depolarization. To explore the molecular basis of the

263 response to ultrasound, we therefore generated a second set of f-i curves with ultrasound  
264 applied 1 s after the start of a 3-s current step (Figure 3A).

265         Ultrasound also had a bidirectional, spike-frequency-dependent effect on excitability  
266 when it was applied 1 second after the start of a current step (Figure 3). Again, ultrasound  
267 decreased firing frequency in the low-firing-frequency, near-threshold region of the f-i curve,  
268 and increased spike rate in the high-firing-frequency, suprathreshold region of the curve (Figure  
269 3B-D). However, the excitatory effect was more pronounced than we observed when the  
270 ultrasound pulse started 500 ms before the start of the current step. Here, ultrasound  
271 potentiated firing frequency by several hundred percent for high input currents (Figure 3D), as  
272 compared with a maximum potentiation of  $49 \pm 16\%$  at 450 pA seen with the earlier ultrasound  
273 application (Figure 2C). This reflects the fact that in response to prolonged injection of high  
274 amplitude currents, accumulation of voltage-gated  $\text{Na}^+$  channel ( $\text{Na}_v$  channel) inactivation can  
275 drive pyramidal cells into a refractory state where spiking is infrequent and irregular or entirely  
276 absent (for example, the voltage trace for the control condition at +450 pA in Figure 3C shows  
277 an initial steep decline in action potential height, followed by a gradual partial recovery of  
278 action potential height, followed by a period of no action potential activity). If neurons are in  
279 this refractory state during the ultrasound application, ultrasound can “rescue” firing (as in the  
280 example voltage trace for the ultrasound condition at +450 pA in Figure 3C). This refractory  
281 state probably does not occur under normal physiological conditions, but the ability of  
282 ultrasound to rescue action-potential firing under these conditions still provides an important  
283 clue as to the molecular mechanisms underlying the effects of ultrasound on firing frequency,  
284 as discussed further below. A hint of this rescue phenomenon is also seen when the ultrasound



285 application starts before the current step, as seen in the abrupt increase in the potentiation  
286 effect at +450 pA (Figure 2C).

287

288 *Effects of ultrasound on interspike intervals.* To examine the effects of ultrasound on action-  
289 potential firing in more detail we compared the latency to the first spike, and the intervals  
290 between subsequent spikes (interspike intervals), in the control and ultrasound conditions  
291 (Figure 4). To summarize these results, and to account for the variability in intrinsic excitability  
292 between cells, we averaged *instantaneous* firing frequencies (latency and interspike intervals)  
293 across cells firing at approximately the same *average* firing frequency (either 5, 10, or 20 Hz) in  
294 the control condition at whatever input current was necessary to achieve these average firing  
295 frequencies, and at the same input current in the ultrasound condition (Figure 4A-C). We note,  
296 however, that this averaging procedure can obscure some of the details of ultrasound's effects.  
297 At 5 Hz the effect of ultrasound applied 500 ms before the start of the current step is  
298 predominantly inhibitory (as seen in the longer average latency and interspike intervals in the  
299 ultrasound as compared with the control condition (Figure 4A), but the interval between the  
300 first and second spikes was actually shorter in the ultrasound condition than the control  
301 condition in some cells (6 out of 13 cells in this data set). This effect occurs because, even at  
302 relatively low average firing frequencies, pyramidal cells will occasionally fire "doublets" or  
303 high-frequency bursts of two action potentials, in which a second action potential is triggered  
304 by the after-depolarization of the initial action potential. When this occurs, ultrasound  
305 decreases the interval between spikes (Figure 4D). This result indicates that the mechanism by  
306 which ultrasound potentiates firing at high average firing frequencies is also active under

307 conditions of low overall average firing frequency, during localized periods of high-frequency  
308 firing. A similar combination of inhibitory and excitatory effects can be observed at 10 Hz and  
309 even 20 Hz (Figure 4B-C). At 20 Hz, ultrasound still increased the latency to the first spike ( $16 \pm$   
310  $2$  ms versus  $12 \pm 1$  ms in the control condition;  $N = 12$ ,  $P = 5.2 \times 10^{-4}$ , paired, two-tailed  
311 Student's t-test), despite decreasing the interspike interval for all subsequent spikes (Figure 4C).  
312 The effect of ultrasound was also mixed when ultrasound was applied 1 s after the start of the  
313 current step (Figure 4E).

314  
315 *Effects of ultrasound on resting membrane potential.* Ultrasound also has effects on resting  
316 membrane potential, which can be observed by averaging several voltage traces aligned to the  
317 onset of the ultrasound pulse, in the absence of injected current. As shown in Figure 5A,  
318 ultrasound has a slight hyperpolarizing effect on resting membrane potential. The average  
319 voltage traces also show another interesting effect of ultrasound. In addition to the relatively  
320 constant hyperpolarization, there is a transient *depolarization* of the resting membrane  
321 potential, preceding the hyperpolarization effect and acting on a faster time scale, at the onset  
322 of the ultrasound pulse; this transient depolarization is matched by a roughly symmetrical  
323 transient hyperpolarization at the offset of the pulse (Figure 5A, *arrows*). The symmetrical,  
324 on/off nature of these transients suggests that they are caused by changes in membrane  
325 capacitance, as does the fact that they occur much faster than the steady-state changes in  
326 resting membrane potential (Figure 5A-C). (Changes in membrane potential due to changes in  
327 capacitance can occur much faster than those due to ionic currents because they do not involve  
328 actual redistribution of charges across the membrane and are therefore not limited by

329 membrane conductance). Thus, the results in Figure 5 can be described by three distinct steps:  
330 1) ultrasound rapidly increases membrane capacitance (C) at the onset of the ultrasound pulse,  
331 which causes the membrane voltage (V) to become less negative (due to an increase in the  
332 denominator in the equation  $V=Q/C$ , where Q is the negative total charge on the membrane);  
333 2) ionic currents then slowly change the membrane voltage to a steady-state value determined  
334 by the total ionic current (one or more ion channels having been affected by ultrasound)  
335 resulting in membrane hyperpolarization; 3) at the offset of the ultrasound pulse, capacitance  
336 rapidly relaxes back to its initial value, producing a transient decrease in membrane voltage,  
337 through essentially the same mechanism as in step 1. We investigate the physical basis of these  
338 capacitance changes and their relationship to the effects of ultrasound on excitability further  
339 below, but one point worth mentioning here is that the change in capacitance is too small for  
340 its effect on the rate of membrane charging (less than 1% change in membrane time constant)  
341 to have a significant effect on excitability in and of itself.

342

343 *The K2P channel hypothesis.* What ion channels might be responsible for the effects of  
344 ultrasound on excitability and resting membrane potential? A compelling hypothesis—able to  
345 explain all of our data—is that ultrasound activates a fast-activating, non-inactivating potassium  
346 channel, such as members of the K2P potassium channel family. While commonly described as  
347 “voltage-independent”, K2P channels (with the exception of TWIK-1 channels) actually have an  
348 outwardly-rectifying, voltage-dependent open probability under physiological  $K^+$  gradients due  
349 to the interaction of permeant ions in the selectivity filter with an activation gate (Schewe et  
350 al., 2016). Nonetheless, their rate of activation is fast (millisecond time-scale) and voltage-

351 independent, such that they are functionally similar to truly voltage-independent channels with  
352 outwardly rectifying single-channel conductance. A primary reason for suspecting K2P channels  
353 is that the effects of ultrasound are similar regardless of whether ultrasound is presented 500  
354 ms before or 1 s after the start of the current step (compare Figures 2 and 3), consistent with  
355 the idea that ultrasound affects a channel that does not undergo prolonged voltage-dependent  
356 inactivation during sustained depolarizations. Related to this point, the effects of ultrasound  
357 are not diminished by repetitive, high-frequency action potential firing (for example, in Figure  
358 4C effects of ultrasound are clearly present throughout the entire 20-Hz, 10-spike train).  
359 Further, a striking feature of the effects of ultrasound on spike intervals is that ultrasound  
360 always increases the latency to the first spike (Figure 4A-C), regardless of the input current and  
361 the rate of approach to the initial action potential threshold, consistent with the idea that  
362 ultrasound affects a fast-activating, non-inactivating channel.

363 CA1 pyramidal neurons express a variety of K2P channel subunits. Expression of TASK-1  
364 and TASK-3, TREK-1 and TREK-2, TRAAK, and TWIK has been shown at the mRNA level (Talley et  
365 al., 2001), while expression at the protein level has been shown has been shown for TASK-3 in  
366 CA1 pyramidal neurons specifically (Marinc et al., 2014), and for TRAAK throughout the central  
367 nervous system (Brohawn et al., 2019). In addition, functional expression of TASK-like currents  
368 has been shown in CA1 pyramidal neurons using patch-clamp recording (Taverna et al., 2005).  
369 TREK and TRAAK channels are particularly interesting in the present context since they are  
370 exceptionally sensitive to mechanical force and to increases in temperature between  
371 approximately 20 and 40°C (Maingret et al., 2000; Kang et al., 2005). Thus, TREK and TRAAK

372 channels are responsive to the two leading candidate mechanisms by which ultrasound at 43  
373 MHz could modulate ion channel activity.

374           Activation of K2P channels by ultrasound could account for all of the neurophysiological  
375 effects of ultrasound described so far: hyperpolarization of resting membrane potential;  
376 inhibition of action-potential firing in response to near-threshold current injections; and—  
377 although this last point may seem counter-intuitive—potentiation of action potential firing at  
378 high firing frequencies. Hyperpolarization of resting membrane potential by increased outward  
379  $K^+$  current is straightforward, as is the idea that  $K^+$  current can inhibit firing, but  $K^+$  current can  
380 also potentiate firing by its effects on action-potential repolarization and afterhyperpolarization  
381 (AHP). By accelerating the rate of membrane repolarization following the peak of an action  
382 potential (thereby reducing action potential width)  $K^+$  current can reduce inactivation of  
383 voltage-dependent  $Na^+$  channels during the action potential, and by increasing the depth of the  
384 AHP, it can accelerate the voltage-dependent recovery of  $Na_v$  channels from inactivation. Both  
385 of these effects would tend to increase the population of  $Na_v$  channels available for activation  
386 in response to depolarizing current and would increase the maximum action potential firing  
387 frequency, as we in fact see in response to ultrasound (Figures 2 and 3). This mechanism is well-  
388 known and widespread in neurophysiology, with several  $K^+$  channels, including both K2P  
389 channels and voltage-dependent  $K^+$  channels ( $K_v$  channels), having been shown to facilitate  
390 high-frequency firing (Lien and Jonas, 2003; Brickley et al., 2007; Gu et al., 2007; Gonzalez et al.,  
391 2009; Liu and Bean, 2014; Kanda et al., 2019). The idea that the potentiation of firing by  
392 ultrasound is due to effects on action-potential repolarization and AHP is supported by the  
393 results in Figure 4C. For neurons firing at an average firing frequency of 20 Hz in the absence of

394 ultrasound, ultrasound increases the latency to the first spike, while it decreases the intervals  
395 between all subsequent spikes. The lack of a potentiating effect on the first spike, despite the  
396 otherwise strongly potentiating effects of ultrasound, indicates that the potentiating effect acts  
397 through a process (such as action-potential repolarization and AHP) that occurs *after* the  
398 initiation of the first action potential. The idea that ultrasound can potentiate firing by  
399 activating K<sup>+</sup> current makes specific predictions about the effects of ultrasound on action  
400 potential waveform: ultrasound should accelerate repolarization, decrease action potential  
401 width, and increase the depth of the AHP.

402

403 *Effects of ultrasound on action-potential waveform.* To test the idea that potentiation of firing  
404 by ultrasound is due to activation of K<sup>+</sup> channels, we examined the effects of ultrasound on  
405 action-potential waveform in our recordings. The effects of ultrasound on action-potential  
406 waveform are consistent with the idea that ultrasound facilitates high-frequency firing by  
407 accelerating action-potential repolarization. Figure 6A-F shows the effect of ultrasound applied  
408 500 ms before the start of the current step on action-potential width for cells firing at average  
409 frequencies of 5, 10, and 20 Hz. (Ultrasound also had effects on action-potential height,  
410 although these were less pronounced than the effects on width; effects on height are detailed  
411 in Supplemental Figure 3.) Ultrasound decreased action-potential width for every action  
412 potential at all firing frequencies. As shown in Figure 6G-H, ultrasound also decreased action-  
413 potential width when applied 1 s after the start of a current step, again indicating that the  
414 channels responsible for these effects continue to influence firing frequency and remain  
415 responsive to ultrasound throughout sustained depolarizing current steps.

416           The effects of ultrasound on action-potential width tended to counteract the  
417   broadening of action-potential width that occurs during high-frequency firing. Figure 7 plots  
418   action potential width as a function of action potential number and input current for the  
419   control and ultrasound conditions. In the control condition, there are dramatic differences in  
420   width between the first action potential and subsequent action potentials at high input  
421   currents, while in the ultrasound condition these differences are much less pronounced. To  
422   quantify this effect, we measured the difference in width between the first and third, first and  
423   fifth, and first and last action potentials during the ultrasound stimulus, in response to a +450  
424   pA current step for the control and ultrasound conditions. These differences (mean  $\pm$  SEM,  
425   control vs. ultrasound, N = 9) were  $2.6 \pm 0.9$  vs.  $0.7 \pm 0.1$  ms,  $1.5 \pm 0.1$  vs.  $0.5 \pm 0.1$  ms, and  $1.2 \pm$   
426    $0.2$  vs  $0.5 \pm 0.1$  ms for the third, fifth, and last action potentials ( $P = 0.064$ ,  $1.4 \times 10^{-5}$ , and  
427    $0.0013$ , paired, two-tailed Student's t-test). One plausible interpretation of this result is that  
428   K2P channels activated by ultrasound cause the membrane voltage during the action potential  
429   to repolarize before slower-activating  $K_V$  channels, which would otherwise contribute to action-  
430   potential repolarization, are activated. Since time-dependent activation and inactivation of  $K_V$   
431   channels causes action-potential broadening during repetitive firing (Giese et al., 1998; Shao et  
432   al., 1999; Yue and Yaari, 2004; Kim et al., 2005; Gu et al., 2007), an increase in the contribution  
433   of K2P channels lacking time-dependent inactivation with a concomitant decrease in the  
434   contribution of  $K_V$  channels to action-potential repolarization would reduce time- and  
435   frequency-dependent action potential broadening.

436           Although the effects of ultrasound on action-potential widths are predominantly due to  
437   acceleration of the repolarization phase, we also noted effects on the rising phase of the action

438 potential. These effects are readily apparent in the first derivative of membrane voltage during  
439 the action potential (Figure 8A) or in action potential phase plots (plots of the first derivative of  
440 voltage versus voltage, Figure 8B). In fact, the maximum rates of voltage rise and fall during the  
441 action potential were both consistently increased by ultrasound throughout a spike train  
442 (Figure 8C-D). The effect on the falling phase is to be expected based on the observed decrease  
443 in spike width and the hypothesis that ultrasound activates K2P channels. The effect on the  
444 rising phase is also consistent with this hypothesis, as activation of K2P leading to reduced  $N_{av}$   
445 channel inactivation would increase the number of  $N_{av}$  channels available to activate during  
446 the rising phase of the action potential. Alternatively, increased K2P conductance could  
447 increase the rate of action potential rise by decreasing the membrane time constant (Brickley et  
448 al., 2007). Consistent with these results, decreases in the rates of action-potential rise and fall  
449 were seen with knock-outs of K2P channels in cerebellar granule neurons (Brickley et al., 2007)  
450 and hypothalamic hypocretin/orexin neurons (Gonzalez et al., 2009), while in a heterologous  
451 action-potential firing model higher levels of K2P expression increased the rate of action-  
452 potential rise (MacKenzie et al., 2015).

453         In addition to effects of ultrasound on the rising and falling phases of the action  
454 potential, we also found effects on the AHP. To quantify these effects, we measured the voltage  
455 minimum between action potentials during repetitive firing. Because measurements of this  
456 parameter are very sensitive to changes in resting membrane voltage and series resistance that  
457 can occur over long recording times, we compared voltage minimums before, during, and after  
458 ultrasound application within the same voltage trace (Figure 9A-B) and made a similar  
459 comparison for control recordings. We performed these comparisons for ultrasound applied 1 s



460 after the start of a current, for cells firing at an average frequency of 5 Hz in the control  
461 condition. This firing frequency is near the transition region between the inhibitory and  
462 potentiating effects of ultrasound on spike frequency, such that the spike frequency is similar  
463 for the control and ultrasound conditions, allowing us to compare a similar number of  
464 interspike voltage minima for the control and ultrasound conditions (Figure 9C). This analysis  
465 demonstrates that the depth of the AHP is greater during the ultrasound application than  
466 before or after it, or during the same time windows for the control condition. Together with the  
467 effects of ultrasound on spike waveform (Figure 6), this result supports the idea that ultrasound  
468 activates a sustained outward current, which limits  $\text{Na}_v$  channel inactivation and thereby  
469 potentiates high-frequency firing. Removal of  $\text{Na}_v$  channel inactivation by membrane  
470 hyperpolarization also explains how ultrasound can rescue spiking in neurons that have entered  
471 a refractory state due to accumulation of  $\text{Na}_v$  channel inactivation (Figure 3C, *bottom right*).

472

473 *Physical mechanism of neuromodulation by high-frequency ultrasound.* The idea that  
474 ultrasound acts on K2P channels is also consistent with the physical effects of ultrasound on  
475 biological tissue. At 43 MHz, two plausible mechanisms through which ultrasound might  
476 modulate the activity of ion channels are heating and mechanical stress due to acoustic  
477 radiation force. Absorption of acoustic energy by biological tissue as heat can increase its  
478 temperature, with effects on ion channel gating and all other biological reactions. Absorption  
479 also results in attenuation of ultrasound intensity as the wave propagates, creating spatial  
480 gradients in intensity that give rise to radiation force, which in turn produces tissue  
481 displacement and strain. At the microscopic scale, this displacement and strain may involve

482 increased tension in the cell membrane, cytoskeleton, and extracellular matrix, all of which may  
483 affect excitability through mechanical effects on ion channel proteins. Among the K2P channels  
484 that may be expressed by CA1 pyramidal cells, TREK and TRAAK channels are especially  
485 sensitive to thermal and mechanical stimuli.

486 To gain further insight into these physical mechanisms, we performed finite-element  
487 simulations of the effects of ultrasound on brain slices in the context of our experimental set-  
488 up. The simulated spatial profiles of ultrasound-induced heating and macroscopic tissue  
489 displacement in response to radiation force are shown in Figure 10A-B. Notably, the spatial  
490 profiles of heating and displacement effects are significantly wider than the 90-micron diameter  
491 of the focal volume of the ultrasound beam, with significant heating and displacement  
492 occurring several hundreds of microns away from the beam axis (Figure 10C). This is an  
493 important result because the thermo- and mechanosensitive K2P channels TREK-1 and TRAAK  
494 are expressed at high density at the nodes of Ranvier of vertebrate neurons (Brohawn et al.,  
495 2019; Kanda et al., 2019). The first node of Ranvier is located approximately 100 microns from  
496 the axon initial segment (Kole, 2011). In our experiments, the soma of the patched neuron is  
497 located approximately on the axis of the ultrasound beam (see *Materials and Methods*) so the  
498 first node of Ranvier is probably within the region of the tissue exposed to thermal and  
499 mechanical effects of ultrasound. Axonal K<sup>+</sup> channels play important roles in regulating  
500 excitability (Shah et al., 2008; Kole, 2011; Kanda et al., 2019). It is therefore plausible that a  
501 subpopulation of TREK-1 or TRAAK channels at the nodes of Ranvier could contribute to the  
502 neurophysiological effects of ultrasound. The magnitude of the temperature change is also  
503 consistent with a thermal mechanism for the effects of ultrasound. The maximum temperature

504 change in the simulation is 1.3 C; temperature changes of this size have previously been shown  
505 to affect neural excitability (Owen et al., 2019). The maximum value of the simulated  
506 displacement (1.7 microns) is similar to the displacement measured in the retina during  
507 ultrasound neuromodulation with stimulus parameters similar to those used here (Menz et al.,  
508 2019).

509         Since the activity of TREK and TRAAK channels is highly temperature-sensitive, we  
510 considered whether our results might represent an artefact due to the experiments being  
511 performed at room temperature (21-23°C). Room temperature is near the threshold for  
512 temperature activation of these channels, such that they are mainly inactive in the absence of  
513 other stimuli such as membrane tension, lipid agonists, or acidic pH (Maingret et al., 2000; Kang  
514 et al., 2005). Thus at room temperature in the absence of additional gating stimuli, the relative  
515 increase in thermosensitive K2P current would be greater in our experiments than at  
516 physiological temperatures, which might lead us to overestimate the importance of K2P  
517 channels in the response to ultrasound. On the other hand, the midpoints of the temperature-  
518 activation curves for TREK and TRAAK channels are near 37°C (in other words, near body  
519 temperature in mammals) so that the absolute increase in K2P current in response to increased  
520 temperature is near maximal at physiological temperatures, so we might instead be  
521 underestimating the thermal effects of ultrasound on K2P channels that would occur in  
522 physiological contexts. To cut through this speculation and address these issues, we repeated  
523 our experiments measuring the neurophysiological effects of ultrasound in cells firing at a spike  
524 frequency of approximately 5 Hz at near-physiological temperature (30°C) (Supplemental Figure  
525 4). Similar to what we observed at room temperature, ultrasound inhibited action potential

526 firing at this relatively low spike frequency and decreased action potential width, indicating that  
527 these effects are not especially sensitive to the ambient temperature. However, the  
528 hyperpolarizing effect of ultrasound on the resting membrane voltage that we observed at  
529 room temperature was no longer apparent at 30°C, possibly due to increased noise in the  
530 baseline voltage or more hyperpolarized (in other words, closer to the K<sup>+</sup> reversal potential)  
531 resting voltage at higher temperature.

532         It is instructive to consider the amplitude and time course of the membrane capacitance  
533 change in response to ultrasound (Figure 5) in the context of possible thermal and mechanical  
534 mechanisms. As described above (under *Effects of ultrasound on resting membrane potential*),  
535 the capacitance change in response to ultrasound is fast relative to the membrane time  
536 constant, so we can assume that the total charge on the membrane is constant during the  
537 initial transient depolarization in response to ultrasound (Figure 5A, *left arrow*). In other words,  
538 the numerator in the equation  $V = Q/C$  is constant, so for small changes in voltage the relative  
539 change in voltage is approximately inversely proportional to the relative change in capacitance.  
540 Empirically, membrane capacitance increases by approximately 1% per degree C (Taylor, 1965).  
541 This is consistent with the size of the simulated temperature rise (peak simulated temperature  
542 rise of 1.3°C compared with the measured amplitude of the initial decrease in voltage of  $0.7 \pm$   
543  $0.1\%$ ). However, the time course of the temperature rise (Figure 10D) is much slower than the  
544 time course of the voltage transient (which again, assuming constant Q, is identical to the time  
545 course of the capacitance change). The time course of the change in resting membrane  
546 potential ( $173 \pm 18$  ms, Figure 5), however, parallels that of the temperature rise. (A  
547 capacitance change on the time course of the simulated temperature rise would not have a

548 significant effect on the membrane voltage, as it would be counteracted by ionic currents.)  
549 Thus, the simulated ultrasound heating results strongly suggest that ultrasound affects action-  
550 potential firing in our experiments at least in part through a thermal effect on ion channels, but  
551 do not explain the presence of the capacitive transients.

552 We considered whether the time course of the capacitive transients could instead be  
553 explained by the dynamics of the tissue mechanical response to acoustic radiation force. We  
554 sought to determine whether, having already modeled the static displacement of the tissue, we  
555 could, without retroactively changing any of the tissue material properties, obtain a time course  
556 for tissue displacement similar to that of the capacitive transients using a simple viscoelastic  
557 model with reasonable tissue viscous properties (see *Materials and Methods*). We found that  
558 this could be achieved using a shear viscosity ( $\mu$ ) of 1 Pa·s (Figure 10E). Since the tissue is  
559 essentially incompressible in our model (Poisson's ratio ( $\nu$ ) = 0.4998), this is equivalent to a  
560 relaxation time of  $2\mu \cdot (1 + \nu) / E = 6$  ms (where E is Young's modulus). Biological tissue is a highly  
561 heterogeneous material that displays a variety of active and passive mechanical responses to  
562 force, spanning time scales from milliseconds to hours (Ricca et al., 2013), and as a result its  
563 viscous properties are highly sensitive to the time scale of the measurement and even complex  
564 viscoelastic models encompassing multiple relaxation times may not fully describe the  
565 viscoelastic behavior of tissue. Nonetheless, the shear viscosity/relaxation time in our model is  
566 reasonable for a soft, gel-like material, and is comparable to fast relaxation times observed  
567 experimentally in brain tissue (Arbogast and Margulies, 1999; Abolfathi et al., 2009; Rashid et  
568 al., 2012, 2013). Moreover, the simulated time course of displacement is consistent with  
569 experimental measurements of the tissue displacement in response to ultrasound at 43 MHz

570 and 40 W/cm<sup>2</sup> in the salamander retina, which was found to be complete in less than 10 ms  
571 (Menz et al., 2019).

572 We can therefore make the reasonable assumption that the capacitive transients are  
573 due to a mechanical effect on membrane properties, and we can estimate the size of the  
574 potential ion-channel gating effects that would occur as a result of this mechanical effect. The  
575 capacitance of a lipid bilayer membrane is given by  $C = \epsilon \cdot \epsilon_0 \cdot A/L$ , where  $\epsilon$  is the dielectric  
576 constant of the hydrophobic core of the lipid bilayer,  $\epsilon_0$  is the permittivity (polarizability) of free  
577 space, A is membrane area, and L is the thickness of the hydrophobic core of the membrane.  
578 For small strains like those under consideration here, lipid bilayer membranes can be  
579 considered incompressible, such that a 1% increase in capacitance corresponds to a 0.5%  
580 increase in area and a 0.5% decrease in thickness (White and Thompson, 1973; Alvarez and  
581 Latorre, 1978). An increase in membrane area can be converted to an increase in membrane  
582 tension ( $\gamma$ ) according to  $\gamma = \Delta A \cdot K_A$ , where  $\Delta A$  is the relative change in area and  $K_A$  is the area  
583 elastic constant of the membrane. Area elastic constants measured for lipid membranes are on  
584 the order of 100's of mN/m (Evans et al., 1976; Kwok and Evans, 1981; Needham and Nunn,  
585 1990). If the capacitance transients are due to membrane strain, the resulting membrane  
586 tension is on the order of a few 0.1 mN/n to a few mN/m. These values are similar to the  
587 tension thresholds for activation of mechanosensitive K2P channels (estimated as 0.5-4 mN/m  
588 for activation of TREK-1 and TRAAK (Brohawn et al., 2014)), which are low relative to other  
589 known mammalian mechanosensitive channels. Notably, a recent *in vivo* ultrasound  
590 neuromodulation study of the murine sciatic nerve at 4 MHz, found that tissue displacement *in*  
591 *vivo* was highly correlated with the neuromodulation effects (Lee et al., 2020). Nonetheless,

592 additional data or theoretical advances would be required to firmly associate these capacitive  
593 transients with changes in membrane tension. If such an association could be made, it would  
594 provide strong evidence that ultrasound modulates action potential firing through mechanical  
595 effects of radiation force in our experiments. At present, our results do not rule out this idea,  
596 but the case for mechanical effects remains speculative, while the role of thermal effects seems  
597 highly plausible. Nonetheless, our simulation results support the conclusion that both inhibitory  
598 and excitatory effects of high-frequency ultrasound on action-potential firing are due to  
599 activation of thermo- and mechanosensitive K2P channels.

600

## 601 **DISCUSSION**

602 To summarize, the neurophysiological effects of ultrasound that we have described here can all  
603 be explained by activation of a sustained outward current. We argue that the molecular basis of  
604 this outward current is most likely one or more of the K2P channels expressed by CA1  
605 pyramidal neurons. Although a variety of voltage-dependent K<sup>+</sup> currents shape the action-  
606 potential waveform and regulate excitability in these neurons, several arguments suggest that  
607 K2P channels are the molecular basis of the ultrasound-activated outward conductance. First,  
608 the K2P channels TREK and TRAAK, being strongly mechanosensitive and thermosensitive, have  
609 biophysical properties that make them especially sensitive to physical effects of ultrasound.  
610 Second, the fact that ultrasound has similar effects on firing frequency whether it is applied 500  
611 ms before or 1 s after the start of a current step suggests that ultrasound affects firing through  
612 a channel that does not undergo prolonged voltage-dependent inactivation during sustained  
613 depolarizations. Finally, the neurophysiological effects of ultrasound are, strikingly, essentially

614 the opposite of those caused by knock-out of K2P channels in other neurons, as detailed in the  
615 following paragraph.

616 Knock-out of TASK-3 channels in cerebellar granule neurons increased excitability at low  
617 input currents, but decreased excitability at high input currents and led to failure of sustained  
618 high-frequency firing (Brickley et al., 2007). In addition, knock-out of TASK-3 decreased the  
619 maximum firing frequency and decreased action-potential height while increasing action  
620 potential width through decrease in the rates of both action-potential rise and fall. Similarly,  
621 double knock-out of TASK-1 and TASK-3 in hypothalamic hypocretin/orexin neurons inhibited  
622 high-frequency action potential firing, reduced the rates of action-potential rise and fall, and  
623 decreased the depth of the AHP (Gonzalez et al., 2009). The connection between our results  
624 and these knock-out studies is supported by experiments in a heterologous model system  
625 consisting of HEK cells transfected with TREK-1 and TASK-3 (with endogenous  $K_v$  channels  
626 blocked) and  $Na_v$  channels simulated by dynamic clamp (MacKenzie et al., 2015). In this model  
627 system, high levels of K2P expression were necessary for repetitive action potential firing, and  
628 increased K2P conductance increased the rates of action-potential rise and fall and increased  
629 the threshold current for action-potential firing. (In the context of this model system, a 74%  
630 potentiation of the K2P conductance by halothane produced effects on the rates of rise fall of  
631 the same order as we see here, potentially providing an estimate of the potentiation of K2P  
632 conductance by ultrasound in our experiments. However, caution should be used in  
633 extrapolating from this heterologous model system to neurons expressing a considerably more  
634 complex array of ion channels.) Finally, TREK-1 and TRAAK channels are also necessary for high  
635 frequency firing at the nodes of Ranvier of afferent neurons (Kanda et al., 2019).



636           Ultrasound neuromodulation has been studied in vertebrate axon preparations, where  
637 it has generally been found that ultrasound inhibits action-potential conduction, with the effect  
638 specifically attributed to heating in some cases (Young and Henneman, 1961; Mihran et al.,  
639 1990; Tsui et al., 2005; Colucci et al., 2009). These results are consistent with the idea that  
640 activation of K2P channels by ultrasound can inhibit action potential firing, but it would be  
641 worthwhile to revisit these experiments to see whether the bidirectional, spike-frequency-  
642 dependent effect that we observe is also present in such preparations. Our results also suggest  
643 an approach to ultrasound neuromodulation in which action potential propagation is the locus  
644 of neuromodulation, targeting white-matter tracts instead of soma-dense gray matter. The idea  
645 that ultrasound-activated K<sup>+</sup> currents can both inhibit and potentiate firing might also help  
646 explain why ultrasound can both inhibit and potentiate neural activity *in vivo* (Min et al., 2011).

647           Although activation of K2P channels is sufficient to explain our results, we do not rule  
648 out the possibility that ultrasound affects other channels in addition to K2P's; indeed, we think  
649 it is likely that ultrasound does affect other channels to some extent. All ion-channel gating  
650 reactions are sensitive to temperature, with typical Q<sub>10</sub> values of ~3, such that their rates  
651 would be expected to increase by about 10% based on the temperature changes in our  
652 simulations (Hille, 2001). Mechanical effects of radiation force could also affect channels  
653 besides K2P channels. The mechanically gated channel Piezo2 is expressed in a subset of CA1  
654 pyramidal neurons (Wang and Hamill, 2020). Piezo1 (Qiu et al., 2019) and TRP channels (Oh et  
655 al., 2020; Yoo et al., 2020) have been experimentally linked to ultrasound neuromodulation  
656 effects. In addition, most ion channels and membrane proteins, while not functioning  
657 physiologically as mechanoreceptors, are sensitive to mechanical stimuli to some extent, either

658 through the energetics of their interactions with hydrophobic core of the lipid bilayer or  
659 through mechanical interactions with the cytoskeleton or extracellular matrix. In fact, gating of  
660 voltage-dependent Na<sup>+</sup> (Morris and Juranka, 2007), K<sup>+</sup> (Tabarean and Morris, 2002; Laitko and  
661 Morris, 2004; Beyder et al., 2010), and Ca<sup>2+</sup> (Calabrese et al., 2002) channels, and of NMDA  
662 receptor channels (Kloda et al., 2007), can be modulated by membrane stretch in membrane  
663 patches. However, we previously were unable to detect any mechanical modulation of  
664 heterologously expressed Nav1.2 channels by ultrasound at 43 MHz and 90 W/cm<sup>2</sup> under  
665 conditions where ultrasound activated the mammalian mechanoreceptor channel Piezo1  
666 (Prieto et al., 2018). Neural Nav channels and KCNQ channels interact with the periodic actin  
667 cytoskeleton of axons through spectrin and ankyrin-G at the axon initial segment and nodes of  
668 Ranvier and (Zhou et al., 1998; Pan et al., 2006; Leterrier, 2018), suggesting that they may be  
669 sensitive to modulation by cytoskeletal tension due to acoustic radiation force. The  
670 concentration of TREK-1 and TRAAK channels at the nodes of Ranvier suggest that some similar  
671 interaction with the cytoskeleton may be involved in the localization of these channels,  
672 although this has not been demonstrated, and the intracellular domains that would facilitate  
673 such interactions are relatively small in K2P channels. Ultrasound has been shown to cause  
674 changes in cytoskeletal structure (Mizrahi et al., 2012), which might also affect the activity of  
675 cytoskeleton-associated channels. Thus investigation of the role of other ion channels in  
676 ultrasound neuromodulation should continue. Notably, several of the channels discussed above  
677 have roles in synaptic transmission, so effects of ultrasound on these channels would not be  
678 revealed by our experiments on somatic excitability in response to injected current.

679           It is well established that high-intensity light at infrared and shorter wavelengths can  
680 modulate neural activity through tissue heating. As a general principle, thermal  
681 neuromodulation effects in response to optical stimulation would be expected to be very  
682 similar to thermal neuromodulation effects caused by ultrasound, and studies of optical  
683 neuromodulation could therefore provide useful guidance in interpreting our results. However,  
684 optically based thermal neuromodulation experiments are highly heterogeneous in terms of the  
685 neuromodulation effect, the temperature rise required to produce the effect, and the  
686 mechanistic interpretation of the results (Wells et al., 2007; Richter et al., 2011; Shapiro et al.,  
687 2012; Duke et al., 2013; Walsh et al., 2016; Lothet et al., 2017; Paris et al., 2017; Owen et al.,  
688 2019; Zhu et al., 2019), so their usefulness is limited in this respect. Both inhibition and  
689 potentiation of firing have been reported, and the increase in temperature has varied  
690 considerably, ranging from less than 1 C to 10's of degrees C. The temperature rise in our  
691 simulations is on the low end of this range. However, it has been proposed that spatial or  
692 temporal gradients in temperature, rather than the absolute temperature change, may  
693 determine the response to thermal stimuli (Wells et al., 2007; Paris et al., 2017). In addition,  
694 heating can cause phase changes in lipid bilayers, which have been shown to modulate ion  
695 channel activity (Seeger et al., 2010); in this case, the response to heating would also depend  
696 critically on the initial temperature. Interestingly, a recent study demonstrated inhibition of  
697 firing by small (2°C or less) increases in temperature in several different types of neurons, but  
698 *not* in CA1 pyramidal neurons (Owen et al., 2019). These effects were attributed to inward  
699 rectifier ( $K_{ir}$ ) potassium channels, which are not expressed in CA1 pyramidal neurons. However,  
700 our results suggest that the lack of an effect in pyramidal neurons could also be explained if the

701 experiments were performed at a point on the f-i curve where competing inhibitory and  
702 excitatory effects of heat-activated K<sup>+</sup> current result in no net effect on firing frequency. A  
703 recent *in vivo* ultrasound neuromodulation study in a rat model using ultrasound at 3.2 MHz  
704 with exceptionally long ultrasound exposure times (10's of seconds; see below for a more  
705 general discussion of *in vivo* ultrasound neuromodulation studies) also found that inhibition  
706 could be produced by ultrasound-induced temperature rises of 2°C or less (Darrow et al., 2019),  
707 consistent with this result and our results.

708         Finally, a critical question—to which we cannot yet provide a definitive answer—is  
709 whether the mechanisms underlying the neuromodulatory effects of ultrasound are the same  
710 in our experiments and in *in vivo* experiments using low frequencies. Two results that strongly  
711 argue against similar mechanisms are the much lower intensities that have been reported to  
712 cause neuromodulatory effects in some low-frequency, *in vivo* experiments in small animal  
713 models (Tufail et al., 2010) as compared with our results, and the apparent increase in efficacy  
714 of ultrasound neuromodulation at lower frequencies in *in vivo* experiments. Both thermal and  
715 radiation force effects are proportional to ultrasound intensity, and to the ultrasound  
716 attenuation coefficient, which in tissue is proportional to frequency raised to the power of ~1.1  
717 (Hand, 1998), so these effects would generally be smaller in *in vivo* experiments (especially  
718 small animal experiments) as compared with our experiments. Compounding this issue is the  
719 fact that opposite dependences on the ultrasound frequency have been observed in *in vivo* and  
720 *in vitro* experiments. In an *in vivo* mouse model of ultrasound neuromodulation, it was  
721 determined that the efficacy of neuromodulation decreased with increasing frequency over the  
722 range 0.25-2.9 MHz (King et al., 2013; Ye et al., 2016). This frequency dependence is the

723 opposite of what would be expected for either a thermal or radiation force mechanism. In  
724 contrast, Menz et al. (2019) found that the efficacy of neuromodulation increases with  
725 frequency over the range 1.9-43 MHz in the retina *in vitro*, a thin neural tissue preparation  
726 similar to the one used in our experiments. However, they proposed a model to explain this  
727 discrepancy. Lower ultrasound frequencies generally result in a larger stimulated tissue volume,  
728 which could translate into a more effective stimulus for certain structures of circuit-level neural  
729 connectivity, despite a weaker effect of low-frequency ultrasound at the level of an individual  
730 cell. (The model was presented in the context of a radiation force mechanism, but the same  
731 principle could apply for a thermal mechanism). The idea that circuit-level mechanisms can  
732 amplify the response to ultrasound is supported by comparison of our results with the response  
733 to ultrasound in the retina at 43 MHz. In the retina, potentiation of action-potential firing by  
734 ultrasound at 43 MHz saturates at 10 W/cm<sup>2</sup>, as measured at the population level in an intact,  
735 active neural circuit. Although we have not performed a detailed investigation of the intensity  
736 dependence, we find that a much higher intensity, 50 W/cm<sup>2</sup>, produces relatively moderate  
737 effects on excitability in single cells in the absence of significant network activity. Focusing  
738 solely on the local, cell-level amplitude of thermal and radiation force effects may therefore  
739 overlook important factors related to the global, network-level distribution of these effects.  
740 Such considerations may eliminate the differences in effective ultrasound parameters for *in*  
741 *vivo* and *in vitro* experiments as an argument against similar physical mechanisms for  
742 neuromodulation by high- and low-frequency ultrasound.

743 In conclusion, our results demonstrate that high-frequency ultrasound is a viable and  
744 promising modality for neuromodulation applications where frequency is not limited by

745 transmission through the skull, and our insights into the common molecular mechanisms  
746 underlying both inhibitory and excitatory effects of high-frequency ultrasound pave the way for  
747 rational design and optimization of neuromodulation protocols to consistently produce either  
748 inhibitory or excitatory effects.

749

## 750 **ACKNOWLEDGMENTS**

751 We thank the PIs and members of the Baccus, Butts-Pauly and Huguenard laboratories for  
752 helpful discussions. We thank Mike Menz and Stephen Baccus for critically reading the  
753 manuscript. We thank Marianna Kiraly, Dong Li, and Jason Clark for help with hippocampal slice  
754 preparation and recording. We thank the Stephen Boxer lab for sharing their plasma cleaner.

755 This work was supported by NIH R01 EB019005 (M.M. and B.K.Y.) and NIH BRAIN initiative R01  
756 NS11215 (M.M. and B.K.Y.).

757 The authors declare no competing financial interests.

## 758 **AUTHOR CONTRIBUTIONS**

759 Martin Prieto performed experiments, analyzed data, and wrote the manuscript. Martin Prieto  
760 and Kamyar Firouzi performed computational modeling. Merritt Maduke, Daniel Madison, and  
761 Butrus Khuri-Yakub supervised research. All authors contributed to the design and  
762 interpretation of experiments and edited and revised the manuscript.

763

764

**Table 1. Values of Material Properties Used in Finite-Element Simulations.**

|                                                        | <b>water</b>      | <b>polystyrene</b>           | <b>brain tissue</b> |
|--------------------------------------------------------|-------------------|------------------------------|---------------------|
| <b>density (kg/m<sup>3</sup>)</b>                      | 1000 <sup>a</sup> | 1040 <sup>b</sup>            | 1007 <sup>c</sup>   |
| <b>speed of sound (m/s)</b>                            | 1500 <sup>a</sup> | 2300 <sup>b</sup>            | 1538 <sup>c</sup>   |
| <b>attenuation coefficient at 43 MHz<br/>(neper/m)</b> | 46 <sup>d</sup>   | 160 <sup>e</sup>             | 253 <sup>f</sup>    |
| <b>heat capacity (J/kg·K)</b>                          | 4180 <sup>a</sup> | 1200 <sup>g</sup>            | 3500 <sup>h</sup>   |
| <b>thermal conductivity (W/m·K)</b>                    | 0.6 <sup>a</sup>  | 0.1 <sup>g</sup>             | 0.5 <sup>h</sup>    |
| <b>Young's modulus (Pa)</b>                            | (not applicable)  | 10 <sup>9</sup> <sup>i</sup> | 500 <sup>j</sup>    |
| <b>Poisson's ratio</b>                                 | (not applicable)  | 0.4 <sup>i</sup>             | 0.4998 <sup>k</sup> |
| <b>shear viscosity (Pa·s)</b>                          | (not applicable)  | (not applicable)             | 1 <sup>l</sup>      |

765

Sources for material properties are as follows: <sup>a</sup>standard value; <sup>b</sup>based on typical acoustic

766

properties of plastics (Selfridge, 1985); <sup>c</sup>following Menz et al. (2019), based on (Thijssen et al.,

767

1985); <sup>d</sup>(Company, 1965); <sup>e</sup>measured (Prieto et al., 2018); <sup>f</sup>following Menz et al. (2019), based

768

on (de Korte et al., 1994); <sup>g</sup>based on typical thermal properties of plastics (Gaur and

769

Wunderlich, 1982; Harper, 2006); <sup>h</sup>typical values for soft tissues (Hand, 1998); <sup>i</sup>based on typical

770

mechanical properties of plastics (Harper, 2006); <sup>j</sup>Menz et al. (2019), from measurements of

771

ultrasound-induced displacement in the retina; <sup>k</sup>tissue assumed to be incompressible for small

772

deformations; <sup>l</sup>see text.

773

774

775

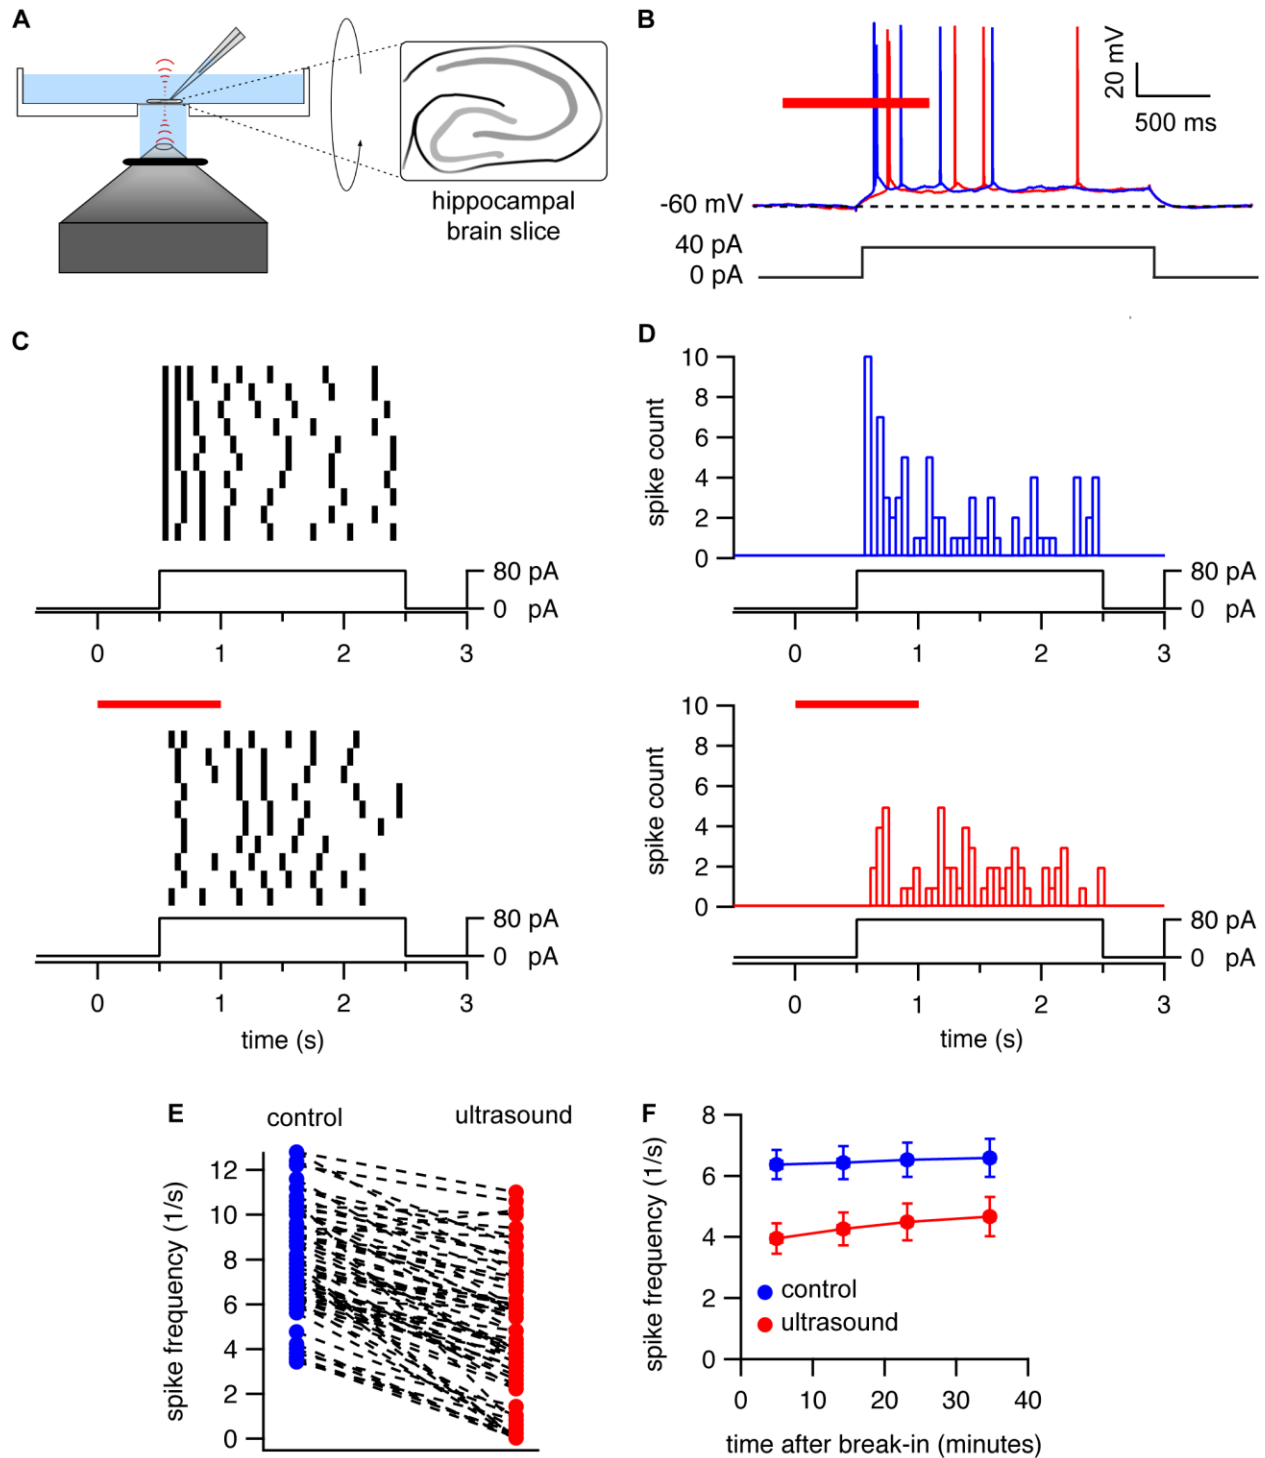

776

777

778

779

780

781

**Figure 1. Consistent inhibition of action potential firing by high-frequency ultrasound. A.**

Diagram of experimental set-up. Ultrasound is applied to 500-micron hippocampal brain slices resting on a 25-micron film of polystyrene. The 43-MHz focused transducer is located below the experimental chamber, with ultrasound propagating perpendicular to the bottom of the recording chamber. **B.** Experimental protocol and example voltage traces showing inhibition of



782 action potential firing by ultrasound. A 1-s, continuous-wave ultrasound pulse at 43 MHz and 50  
783  $W/cm^2$  (*red bar*) is applied 500 ms before the start of a 2-s current injection. Voltage traces are  
784 shown in the presence (*red*) and absence (*blue*) of the ultrasound stimulus. The *dashed line*  
785 indicates the resting membrane voltage. **C.** Example raster plots showing a consistent effect of  
786 ultrasound on firing frequency. The results of twenty consecutive trials of the protocol in panel  
787 B, alternating between the control (*top*) and ultrasound (*bottom*) conditions, are shown. The  
788 voltage traces were divided into 50-ms bins; a solid black bin indicates that an action potential  
789 occurred within that particular time bin. Time is relative to the start of the ultrasound pulse. **D.**  
790 Spike-time histograms prepared by summing the ten trials for the control (*top, blue bars*) and  
791 ultrasound (*bottom, red bars*) conditions from panel C. **E.** Summary of the effects of ultrasound  
792 for  $N = 66$  cells. The average firing frequency during the first 500 ms of the current step is  
793 shown for the control (*blue*) and ultrasound (*red*) conditions. **F.** Stability of the ultrasound  
794 response. Mean ( $\pm$ SEM,  $N = 10$  cells) spike frequencies during the first 500 ms of a current step  
795 in the presence (*red circles*) and absence (*blue circles*) of ultrasound for the protocol shown in  
796 panel B, as a function of time relative to break-in (establishment of whole-cell recording  
797 configuration). Spike frequencies were measured at various time points between 0 and 10, 10  
798 and 20, 20 and 30, and 30 and 40 minutes after break-in. The x-values represent the mean start  
799 time for the protocol to measure spike frequencies (which comprised 2 minutes of recording  
800 time). The amplitude of the current step was adjusted over time to maintain spiking behavior as  
801 close as possible to that at the start of the experiment.  
802

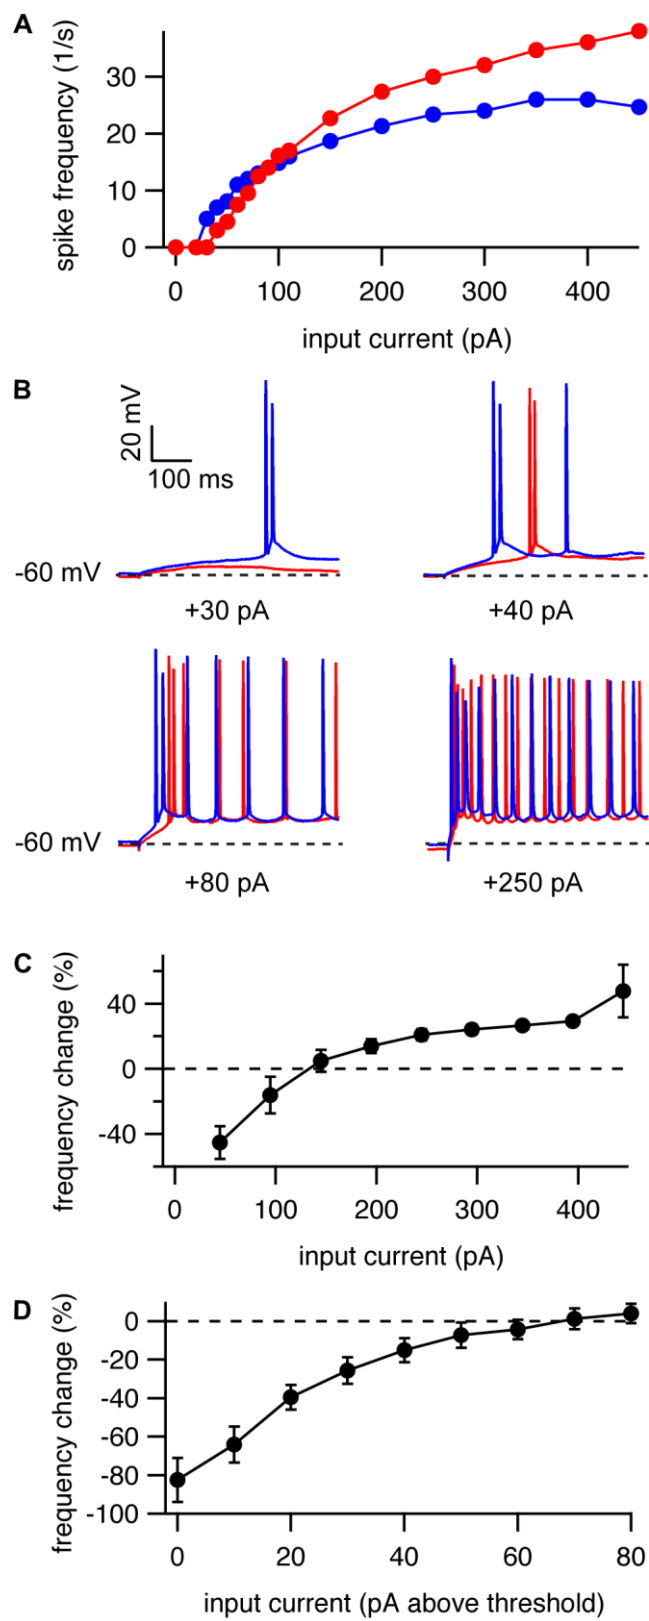

803

804 **Figure 2. Ultrasound can inhibit or potentiate action-potential firing.** **A.** Example frequency-  
805 input curve showing average firing frequency during the first 500 ms of a current step as a  
806 function of input current, with (*red*) and without (*blue*) a 1-s ultrasound pulse starting before  
807 500 ms before the start of the current step. Each point represents the average of three trials on  
808 the same cell. **B.** Example voltage traces for the cell in A showing action potential firing during  
809 the first 500 ms of current steps to either +30, +40, +80, or +250 pA, with (*red*) and without  
810 (*blue*) ultrasound. The *dashed lines* indicate the approximate resting membrane voltage of -60  
811 mV. **C.** Mean ( $\pm$ SEM, N = 9 cells) change in spike frequency in response to ultrasound as a  
812 function of input current. **D.** Inhibition is strongest near threshold. Mean ( $\pm$ SEM, N = 7 cells)  
813 change in spike frequency in response to ultrasound as a function of input current relative to  
814 the threshold current for action potential firing, for near-threshold currents.  
815

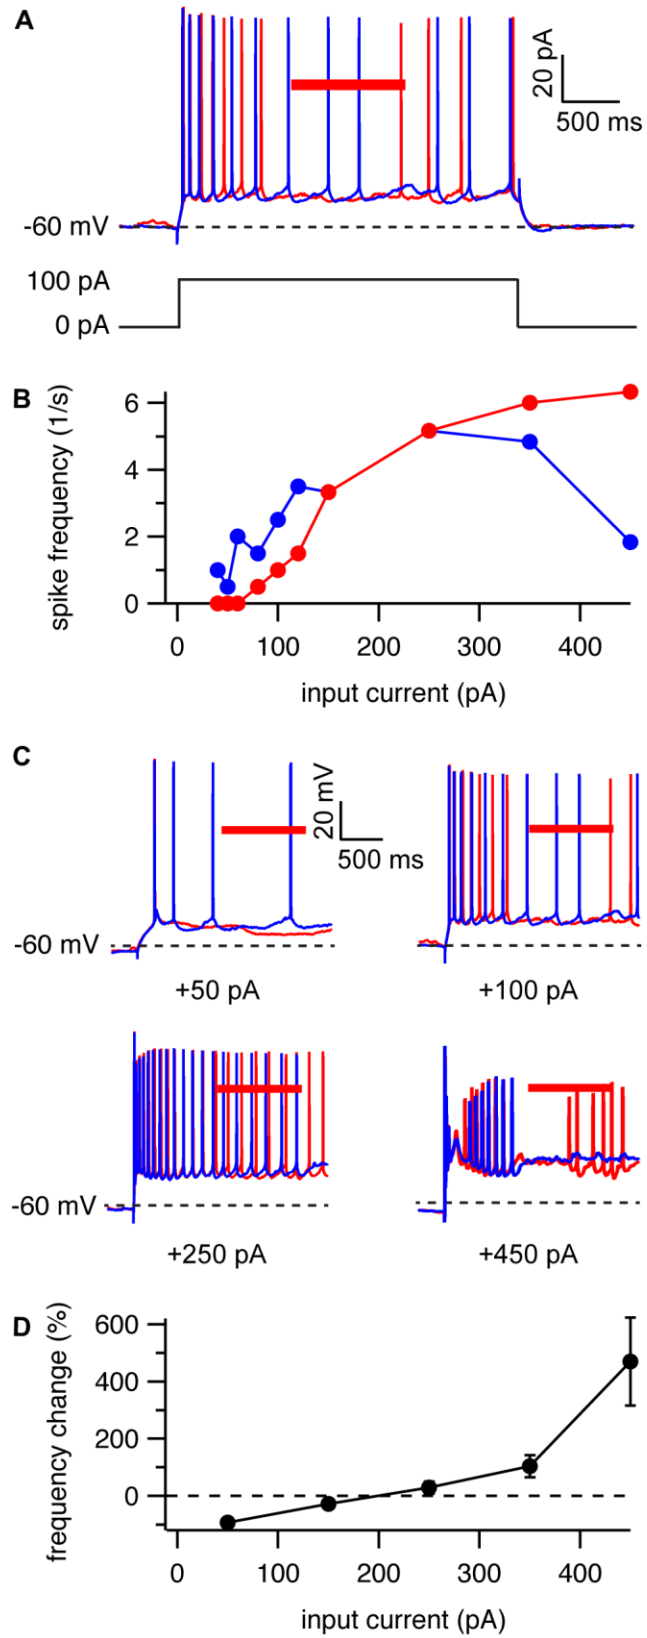

816

817 **Figure 3. Ultrasound can also inhibit or potentiate action-potential firing when applied late in**  
818 **a current step. A.** Experimental protocol and example voltage traces with (*red*) and without  
819 (*blue*) ultrasound. Ultrasound is applied 1 s after the start of a 3-s current step. The *dashed line*  
820 indicates the resting membrane voltage. **B.** Example frequency-input curve showing average  
821 firing frequency during the ultrasound application for the protocol in A (*red*) and during the  
822 same time window without ultrasound (*blue*), as a function of input current. Each point  
823 represents the average of three trials on one cell. **C.** Example voltage traces for the cell in B  
824 showing action potential firing during the ultrasound application (*red*) and during the same  
825 time window without ultrasound (*blue*) in response to current steps to either +50, +100, +250,  
826 or +450 pA. The *dashed lines* indicate the approximate resting membrane voltage of -60 mV. **D.**  
827 Mean ( $\pm$ SEM) change in spike frequency in response to ultrasound as a function of input current  
828 (N = 3 cells at +50 pA; N = 6 cells at all other input currents). (In 3 cells, the firing frequency at  
829 +50 pA was zero for both the control and ultrasound conditions).  
830

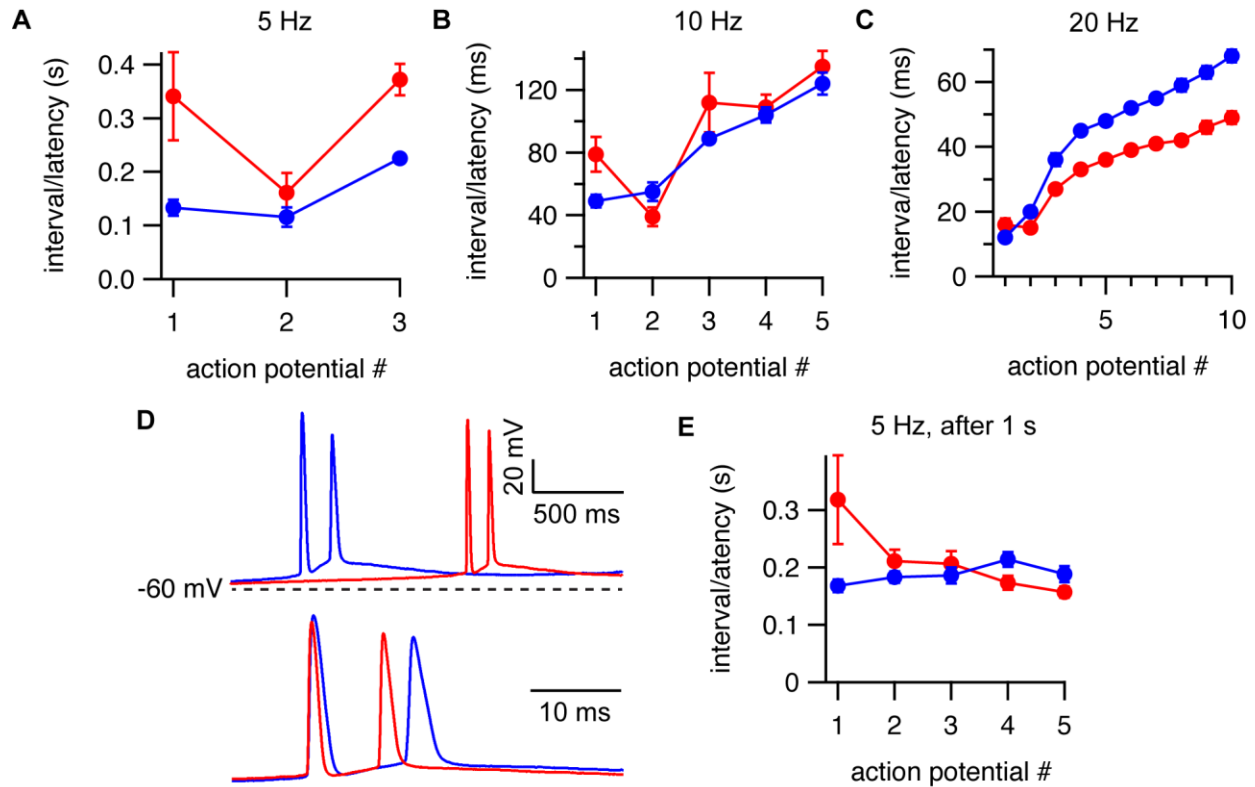

831

832 **Figure 4. Effects of ultrasound on action potential timing.** A-C. Mean ( $\pm$ SEM) latency between

833 the start of the current step and the first action potential, and mean intervals between the first

834 and second, and second and third, etc. action potentials, for cells firing at average frequencies

835 of approximately 5 Hz (N = 13 cells), 10 Hz (N = 15 cells), and 20 Hz (N = 13 cells) during the first

836 500 ms of the current step, with (red) or without (blue) a 1-s ultrasound pulse starting 500 ms

837 before the current step. The actual spike frequencies were  $5.6 \pm 0.1$ ,  $10.5 \pm 0.2$ , and  $20.4 \pm 0.3$

838 Hz, and the injected currents were  $70 \pm 7$ ,  $115 \pm 9$ , and  $292 \pm 28$  pA for the 5, 10, and 20 Hz

839 conditions. D. Example voltage traces showing decreased interval between the first and second

840 action potentials at low average firing frequency. The top panel shows the first two action

841 potentials for the control (blue) and ultrasound (red) conditions. The dashed line indicates the

842 approximate resting membrane voltage of -60 mV. The bottom panel shows the same data,

843 aligned to the action potential threshold on a zoomed-in time scale. E. Same as A-C, for an

844 average firing frequency of 5 Hz, except that ultrasound was applied 1-s after the start of a 3-s  
845 current step, and the average firing frequency and intervals/latency were determined during  
846 ultrasound stimulus or during the same time period without ultrasound (N = 6). The actual spike  
847 frequency was  $5.2 \pm 0.2$  Hz, and the injected currents was  $183 \pm 21$  pA.

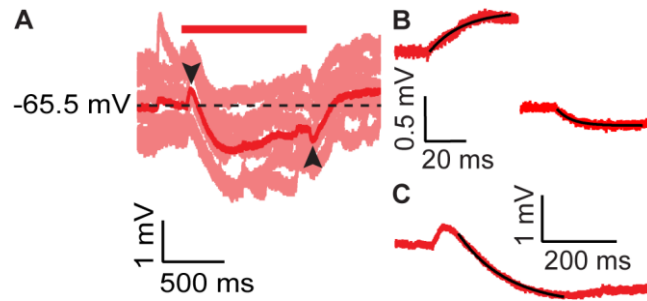

848

849 **Figure 5. Effects of ultrasound on resting membrane potential and membrane capacitance. A.**

850 Six individual voltage traces (*pink*) and the average of these voltage traces (*red*) showing the

851 effect of ultrasound (*red bar*) on resting membrane potential. The *black arrows* indicate

852 transients due to changes in membrane capacitance. The *dashed line* indicates the mean resting

853 membrane voltage. **B.** Zoomed-in timescale showing the fast voltage transients (*black arrows*

854 in A) for ultrasound onset (*top left*) and offset (*bottom right*). Exponential fits (*black lines*) to the

855 rise and fall of the voltage transients give amplitudes and time constants of 0.45 mV and 16.3

856 ms for the onset and 0.22 mV and 6.7 ms for the offset, for the example shown; mean values

857 ( $\pm$ SEM) were  $0.41 \pm 0.04$  mV and  $10.4 \pm 1.2$  ms for the onset and  $0.35 \pm 0.04$  mV and  $9.7 \pm 1.7$

858 ms for the offset (N = 15). No significant differences were found between the time constants (P

859 = 0.73) or the amplitude (P = 0.087) of the transients (paired, two-tailed Student's t-tests) **C.**

860 Slow membrane hyperpolarization in response to ultrasound from the average trace in panel A

861 on a zoomed-in scale, along with an exponential fit (*black line*) to the initial hyperpolarization.

862 The amplitude and time constant of the exponential fit were 1.55 mV and 132 ms for the

863 example shown; mean values ( $\pm$ SEM) were  $2.4 \pm 0.3$  mV and  $173 \pm 18$  ms (N = 15).

864



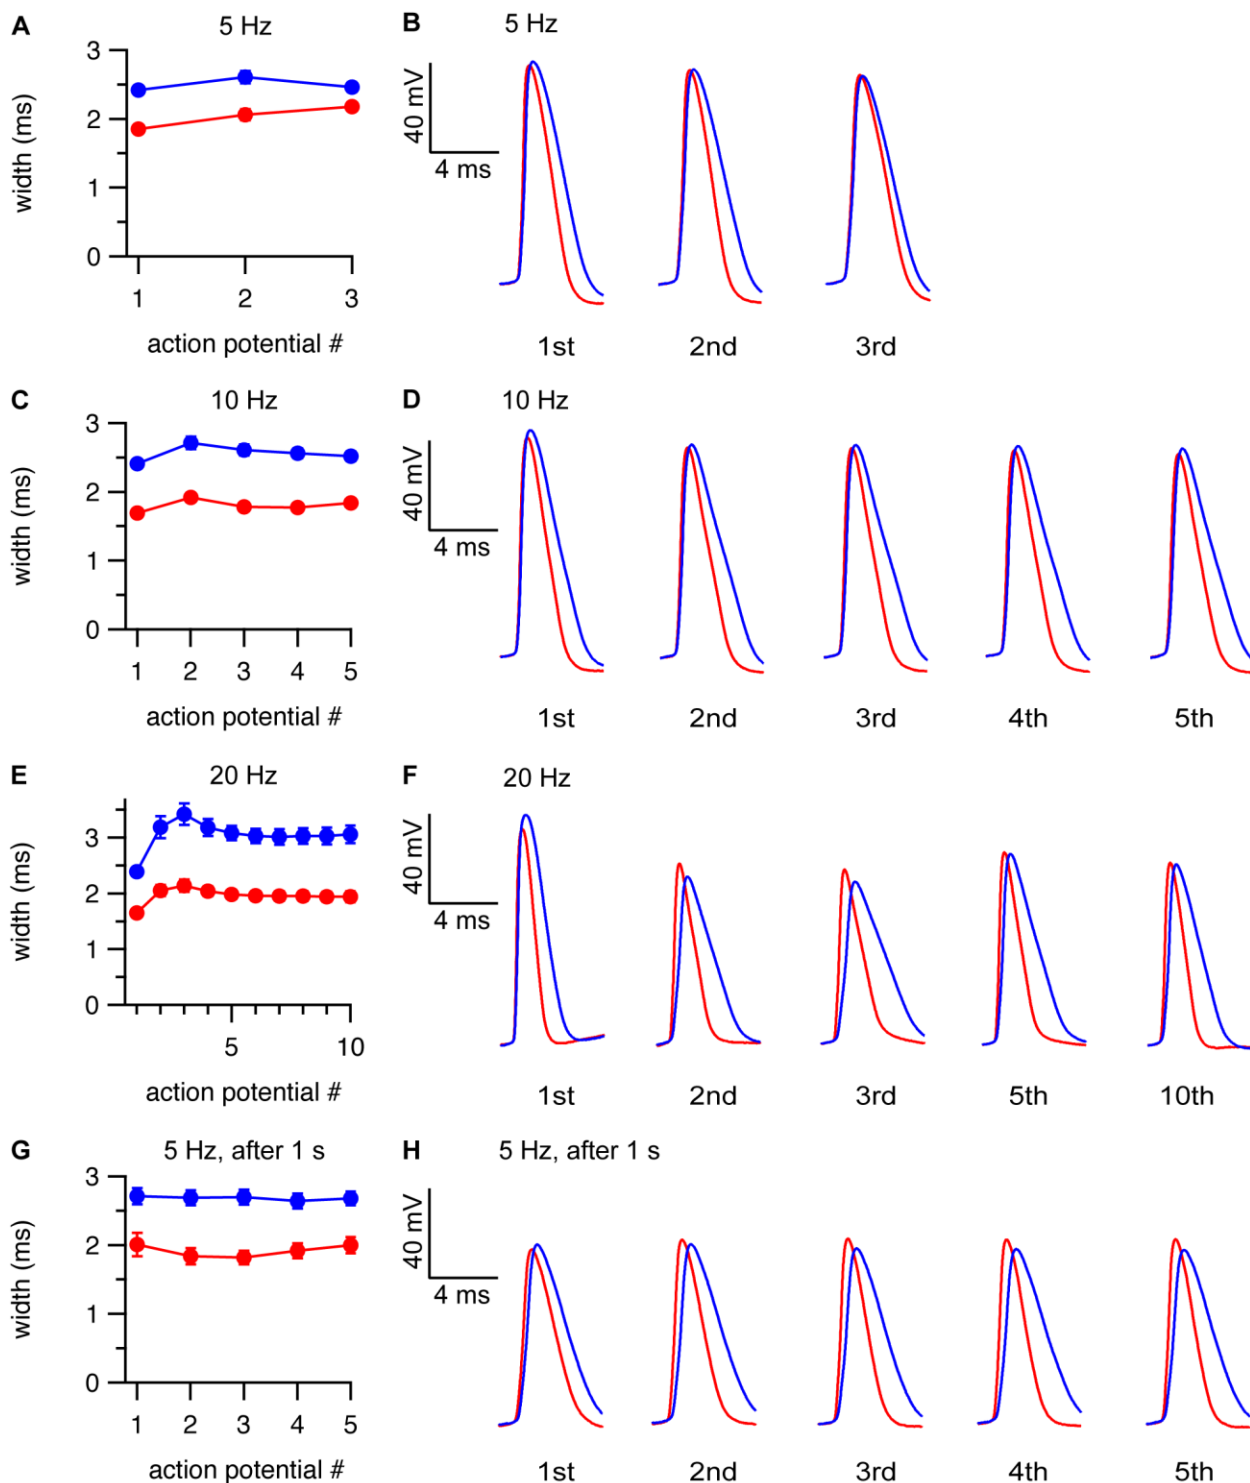

865

866 **Figure 6. Ultrasound decreases action-potential width.** A-B. Mean ( $\pm$ SEM, N = 13 cells) action-  
867 potential widths (A) and example action-potential waveforms aligned to the action-potential  
868 threshold (B) as function of action-potential number in the presence (*red*) and absence (*blue*) of  
869 a 1-s ultrasound pulse starting 500 ms before the current step, for cells firing at an average  
870 firing frequency of approximately 5 Hz (as measured during the first 500 ms of the current step)

871 in the control condition. **C-D.** As in A-B, but for cells firing at an average firing frequency of  
872 approximately 10 Hz in the control condition (N = 15). **E-F.** As in A-B, but for cells firing at an  
873 average firing frequency of approximately 20 Hz in the control condition (N = 13). **G-H.** As in A-  
874 B, but with ultrasound applied 1 s after the start of a 3-s current step, for cells firing at an  
875 average firing frequency of approximately 5 Hz in the control condition, with firing frequency  
876 determined in a 1-s window starting 1 s after the current step (corresponding to the time  
877 period of the ultrasound stimulus), and action potential number relative to the start of the  
878 ultrasound stimulus (N = 6).  
879

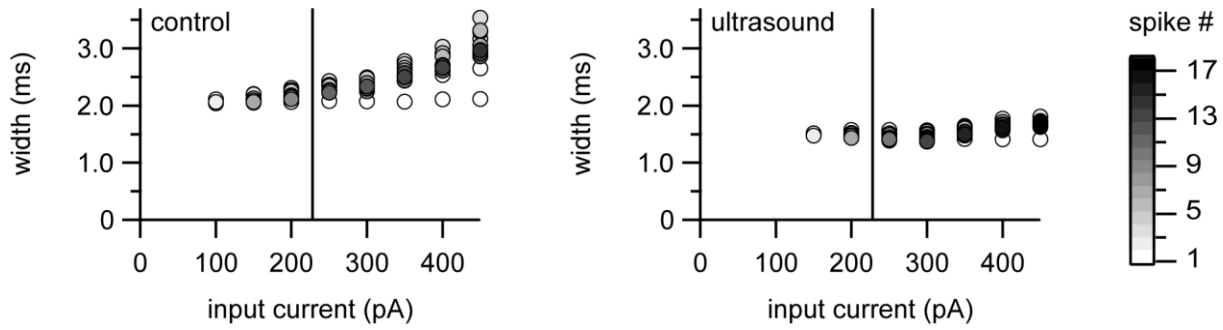

880

881 **Figure 7. Ultrasound reduces action-potential broadening.** Example data showing action-

882 potential width as a function of action-potential number (indicated in *grayscale*, scale bar at far

883 left) and input current level, for the first 500 ms of the current step, for currents from 0 to +450

884 pA in 50 pA steps, with (*right*) or without (*left*) a 1-s ultrasound pulse starting 500 ms before the

885 current step. The vertical lines indicate the approximate location of the transition between

886 inhibitory and potentiating effects of ultrasound.

887

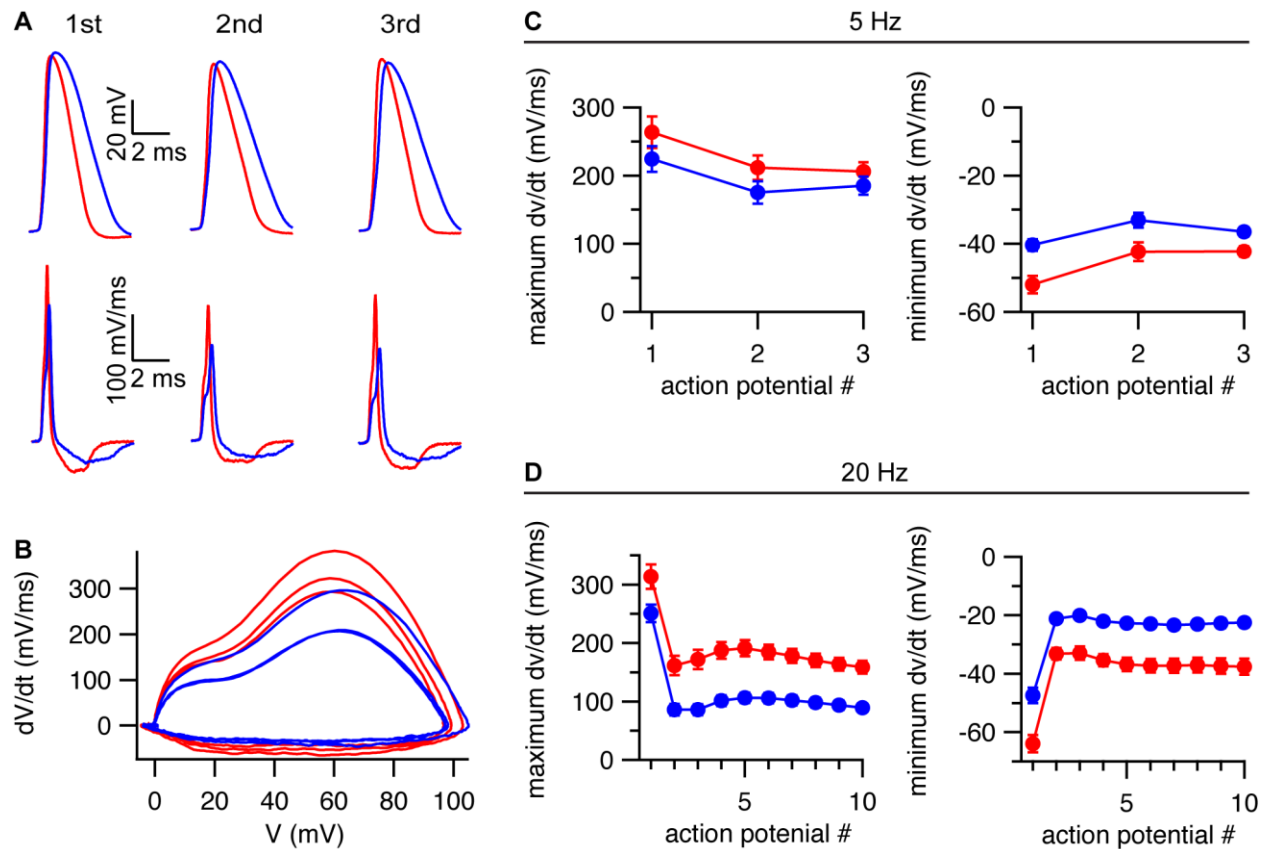

888

889 **Figure 8. Effects of ultrasound on depolarization and repolarization rates.** **A.** Example traces  
 890 showing the membrane voltage (*top*) and its first derivative (*bottom*) for the first three action  
 891 potentials in response to a +100 pA current step in the presence (*red*) and absence (*blue*) of a 1-  
 892 s ultrasound pulse starting 500 ms before the current step, aligned to the action potential  
 893 threshold. **B.** Phase plots for the action potentials shown in panel A. **C-D.** Maximum rates of  
 894 depolarization (*left*) and repolarization (*right*) during the action potential (mean  $\pm$  SEM, N = 13  
 895 cells), as a function of action potential number, in the presence (*red*) and absence (*blue*) of a 1-s  
 896 ultrasound pulse starting 500 ms before the current step, for cells firing at an average firing  
 897 frequency of 5 Hz (**C**) or 20 Hz (**D**) in the control condition.

898

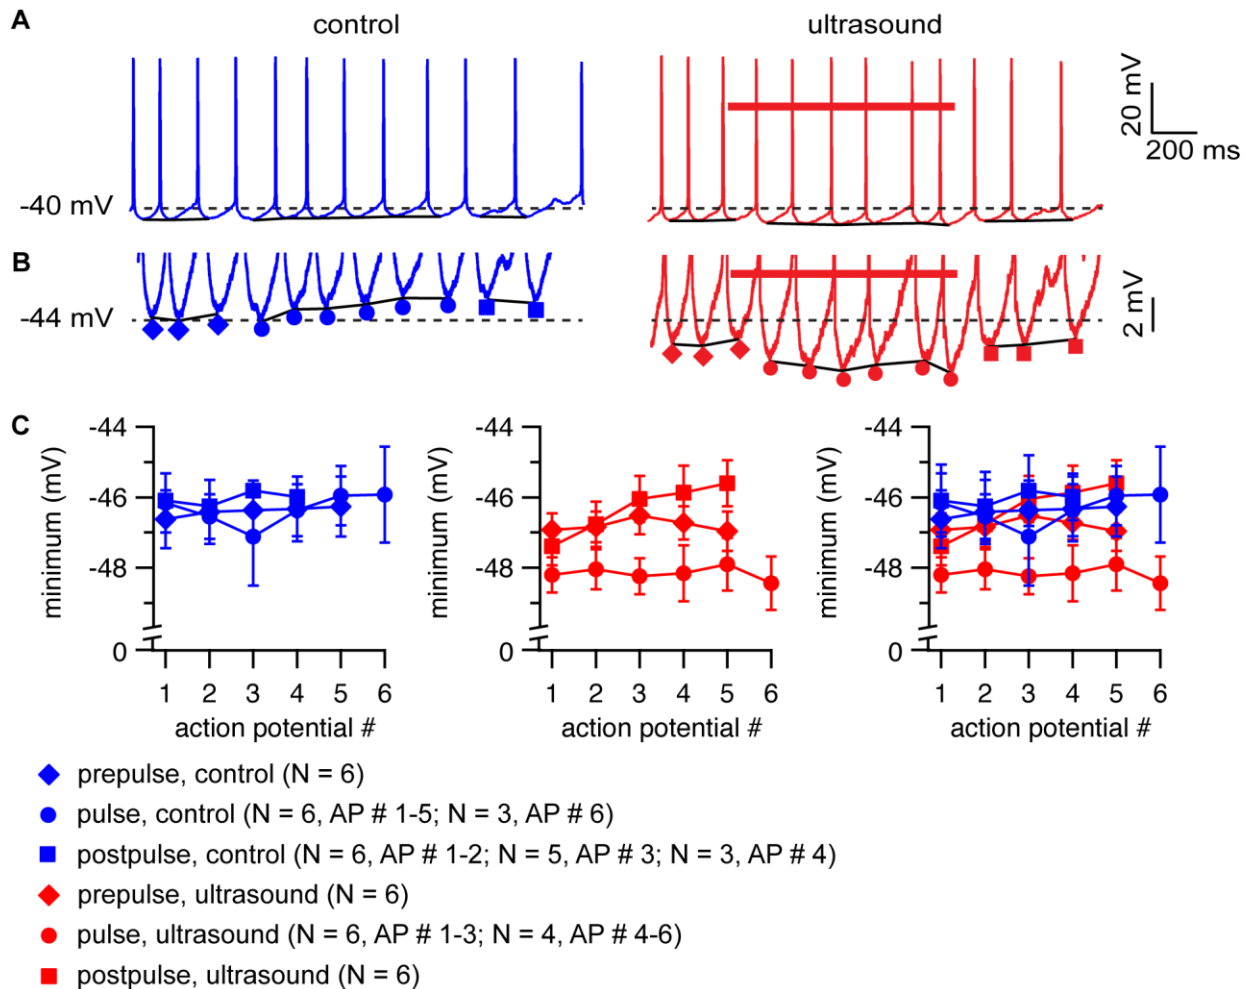

899

900 **Figure 9. Ultrasound increases the depth of the afterhyperpolarization.** **A.** Example voltage  
 901 traces comparing voltage minima between action potentials in response to a 3-s, 250-pA  
 902 current step with (*red voltage trace, right*) and without (*blue voltage trace, left*) a 1-s  
 903 ultrasound pulse (*red bar*) starting 1 s after the start of the current step. The *solid black lines*  
 904 connect the voltage minima between action potentials before, during, or after the ultrasound  
 905 pulse, or during the corresponding time periods for the control condition. The dashed lines  
 906 indicate a reference voltage level of -40 mV. The resting membrane voltage for this cell was -63  
 907 mV. **B.** Same as panel A, on a zoomed-in voltage scale. The *red diamonds* indicate voltage  
 908 minima before the ultrasound pulse, *red circles* indicate voltage minima during the ultrasound  
 909 pulse, and *red squares* indicate voltage minima following the ultrasound pulse; *blue symbols*  
 910 indicate voltage minima for the corresponding time periods for the control condition. The  
 911 dashed lines indicate a reference voltage level of -44 mV. **C.** Mean ( $\pm$ SEM, N = 3-6 cells, see  
 912 figure panel for details) values of the voltage minimum, as a function of action potential (AP)  
 913 number for the first four to six action potentials before, during, and after the ultrasound pulse,  
 914 along with the equivalent mean values for the control condition, following the symbolism  
 915 indicated in panel B. The means were determined for cells firing at the same average frequency

916 (5 Hz) during a 1-s window starting 1 s after the start of the current step (corresponding to the  
917 period of the ultrasound stimulus) in the control condition. For clarity, the results are shown  
918 separately for the control group only (*left*), the ultrasound group only (*middle*), and for both  
919 groups simultaneously (*right*). Significant differences between groups were only found in the  
920 presence of ultrasound ( $P = 1.0 \times 10^{-4}$ ,  $1.4 \times 10^{-5}$ , and 0.16 for before versus during, during  
921 versus after, and before versus after the ultrasound pulse;  $P = 0.92$ , 0.39, and 0.35 for  
922 comparisons of the same time periods in the control condition (unpaired, two-tailed Student's  
923 t-tests, unequal variance).  
924

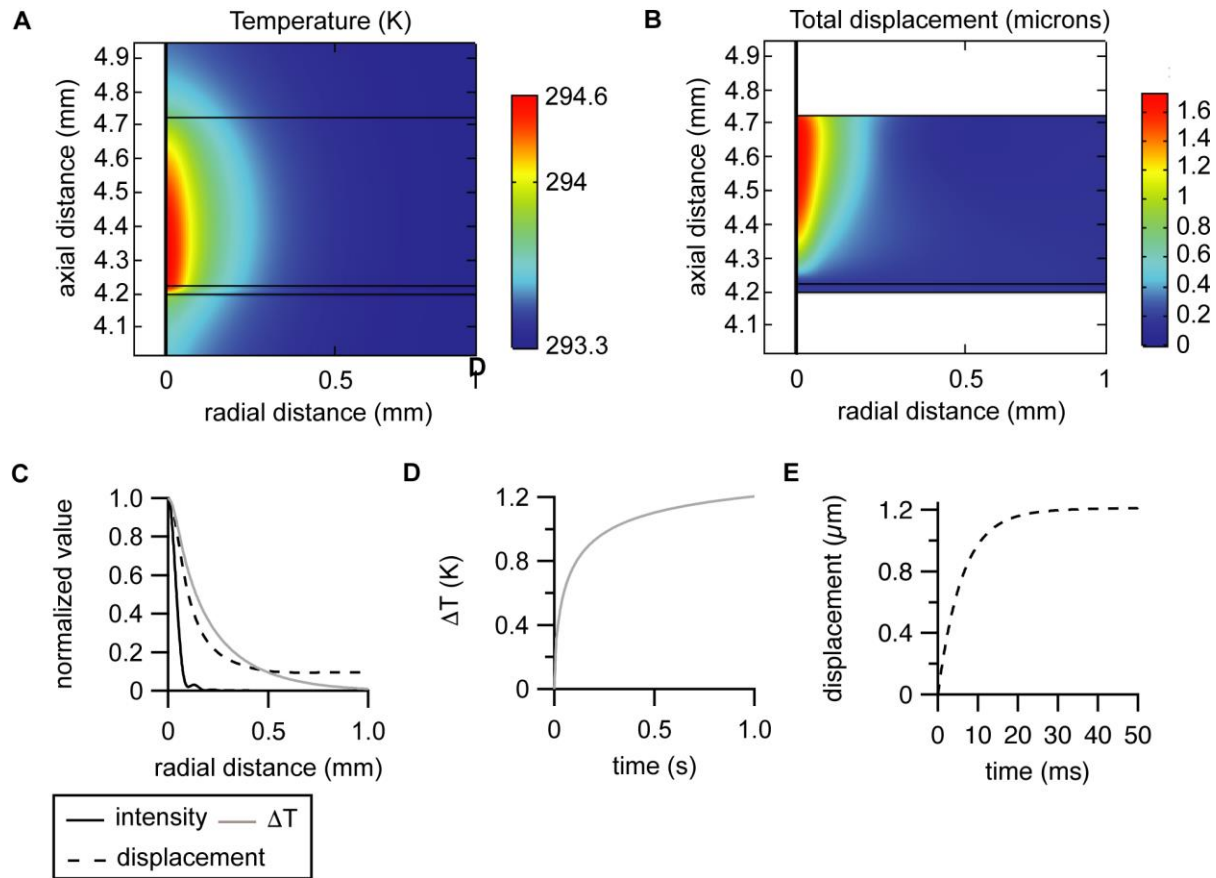

925

926 **Figure 10. Simulated tissue heating and displacement in response to ultrasound.** A. Spatial  
927 profile of temperature after one second of ultrasound exposure at 43 MHz and 50 W/cm<sup>2</sup>, as a  
928 function of axial distance from the transducer surface and radial distance from the ultrasound  
929 beam axis, in a 500-micron thick brain slice and 25-micron thick polystyrene film (*middle two*  
930 *layers*) and the surrounding fluid (external solution, *top layer*, and distilled water, *bottom*  
931 *layer*). B. Spatial profile of the static total displacement in response to acoustic radiation force  
932 in the brain slice and polystyrene film. C. Normalized values of the acoustic intensity (*solid black*  
933 *line*), temperature rise after 1 second of ultrasound exposure (*solid gray line*), and total  
934 displacement (*dashed line*), at a depth of 250 microns in the brain slice, as a function of radial  
935 distance. D. Time course of the temperature rise in response to ultrasound at a depth of 250

936 microns in the brain slice on the axis of the ultrasound beam. The time course of the  
937 temperature change can be described by two exponential components with amplitudes and  
938 time constants of -0.56 C and 30 ms, and -0.57 C and 295 ms, for a weighted time constant of  
939 164 ms. **E.** Time course of the displacement in response at ultrasound at a depth of 250 microns  
940 in the brain slice on the axis of the ultrasound beam. The time course of the displacement  
941 change can be described by two exponential components with amplitudes and time constants  
942 of -1.2 microns and 6 ms, and -0.13 microns and 344 ms, for a weighted time constant of 39 ms.  
943 Note that the steady-state displacement is slightly smaller than in the static displacement  
944 simulation due to the inclusion of the fluid loading in the dynamic displacement simulation.

945

946

947

948



- 949 Abolfathi, N., A. Naik, M. Sotudeh Chafi, G. Karami, and M. Ziejewski. 2009. A micromechanical  
950 procedure for modelling the anisotropic mechanical properties of brain white matter.  
951 *Comput Methods Biomech Biomed Engin.* 12:249-262.
- 952 Alvarez, O., and R. Latorre. 1978. Voltage-dependent capacitance in lipid bilayers made from  
953 monolayers. *Biophys J.* 21:1-17.
- 954 Arbogast, K.B., and S.S. Margulies. 1999. A fiber-reinforced composite model of the viscoelastic  
955 behavior of the brainstem in shear. *J Biomech.* 32:865-870.
- 956 Bean, B.P. 2007. The action potential in mammalian central neurons. *Nat Rev Neurosci.* 8:451-  
957 465.
- 958 Beyder, A., J.L. Rae, C. Bernard, P.R. Strege, F. Sachs, and G. Farrugia. 2010. Mechanosensitivity  
959 of Nav1.5, a voltage-sensitive sodium channel. *J Physiol.* 588:4969-4985.
- 960 Blackmore, J., S. Shrivastava, J. Sallet, C.R. Butler, and R.O. Cleveland. 2019. Ultrasound  
961 Neuromodulation: A Review of Results, Mechanisms and Safety. *Ultrasound Med Biol.*  
962 45:1509-1536.
- 963 Blanton, M.G., J.J. Lo Turco, and A.R. Kriegstein. 1989. Whole cell recording from neurons in  
964 slices of reptilian and mammalian cerebral cortex. *J Neurosci Methods.* 30:203-210.
- 965 Brickley, S.G., M.I. Aller, C. Sandu, E.L. Veale, F.G. Alder, H. Sambhi, A. Mathie, and W. Wisden.  
966 2007. TASK-3 two-pore domain potassium channels enable sustained high-frequency  
967 firing in cerebellar granule neurons. *J Neurosci.* 27:9329-9340.
- 968 Brohawn, S.G., Z. Su, and R. MacKinnon. 2014. Mechanosensitivity is mediated directly by the  
969 lipid membrane in TRAAK and TREK1 K<sup>+</sup> channels. *Proc Natl Acad Sci U S A.* 111:3614-  
970 3619.
- 971 Brohawn, S.G., W. Wang, A. Handler, E.B. Campbell, J.R. Schwarz, and R. MacKinnon. 2019. The  
972 mechanosensitive ion channel TRAAK is localized to the mammalian node of Ranvier.  
973 *Elife.* 8.
- 974 Bystritsky, A., A.S. Korb, P.K. Douglas, M.S. Cohen, W.P. Melega, A.P. Mulgaonkar, A. DeSalles,  
975 B.K. Min, and S.S. Yoo. 2011. A review of low-intensity focused ultrasound pulsation.  
976 *Brain Stimul.* 4:125-136.
- 977 Calabrese, B., I.V. Tabarean, P. Juranka, and C.E. Morris. 2002. Mechanosensitivity of N-type  
978 calcium channel currents. *Biophys J.* 83:2560-2574.
- 979 Calhoun, M.A., S.A. Bentil, E. Elliott, J.J. Otero, J.O. Winter, and R.B. Dupaix. 2019. Beyond linear  
980 elastic modulus: viscoelastic models for brain and brain mimetic hydrogels. *ACS*  
981 *Biomaterials Science & Engineering.* 5:3964-3973.
- 982 Castaneda-Castellanos, D.R., A.C. Flint, and A.R. Kriegstein. 2006. Blind patch clamp recordings  
983 in embryonic and adult mammalian brain slices. *Nat Protoc.* 1:532-542.
- 984 Colucci, V., G. Strichartz, F. Jolesz, N. Vykhodtseva, and K. Hynynen. 2009. Focused ultrasound  
985 effects on nerve action potential in vitro. *Ultrasound Med Biol.* 35:1737-1747.
- 986 Company, C.R. 1965. Handbook of Chemistry and Physics. 45th.ed. Chemical Rubber Company,  
987 Cleveland, OH.
- 988 Cotero, V., Y. Fan, T. Tsaava, A.M. Kressel, I. Hancu, P. Fitzgerald, K. Wallace, S. Kaanumalle, J.  
989 Graf, W. Rigby, T.J. Kao, J. Roberts, C. Bhushan, S. Joel, T.R. Coleman, S. Zanos, K.J.  
990 Tracey, J. Ashe, S.S. Chavan, and C. Puleo. 2019. Noninvasive sub-organ ultrasound  
991 stimulation for targeted neuromodulation. *Nat Commun.* 10:952.

- 992 Darrow, D.P., P. O'Brien, T.J. Richner, T.I. Netoff, and E.S. Ebbini. 2019. Reversible  
993 neuroinhibition by focused ultrasound is mediated by a thermal mechanism. *Brain*  
994 *Stimul.* 12:1439-1447.
- 995 de Korte, C.L., A.F. van der Steen, and J.M. Thijssen. 1994. Acoustic velocity and attenuation of  
996 eye tissues at 20 MHz. *Ultrasound Med Biol.* 20:471-480.
- 997 Downs, M.E., S.A. Lee, G. Yang, S. Kim, Q. Wang, and E.E. Konofagou. 2018. Non-invasive  
998 peripheral nerve stimulation via focused ultrasound in vivo. *Phys Med Biol.* 63:035011.
- 999 Duck, F.A. 1998. Radiation pressure and acoustic streaming. In *Ultrasound in Medicine*. F. Duck,  
1000 A. Baker and H. Starritt, editors. Institute of Physics Publishing, Philadelphia, PA.
- 1001 Duke, A.R., M.W. Jenkins, H. Lu, J.M. McManus, H.J. Chiel, and E.D. Jansen. 2013. Transient and  
1002 selective suppression of neural activity with infrared light. *Sci Rep.* 3:2600.
- 1003 Evans, E.A., R. Waugh, and L. Melnik. 1976. Elastic area compressibility modulus of red cell  
1004 membrane. *Biophys J.* 16:585-595.
- 1005 Fomenko, A., C. Neudorfer, R.F. Dallapiazza, S.K. Kalia, and A.M. Lozano. 2018. Low-intensity  
1006 ultrasound neuromodulation: An overview of mechanisms and emerging human  
1007 applications. *Brain Stimul.* 11:1209-1217.
- 1008 Fry, F.J., H.W. Ades, and W.J. Fry. 1958. Production of reversible changes in the central nervous  
1009 system by ultrasound. *Science.* 127:83-84.
- 1010 Gaur, U., and B. Wunderlich. 1982. Heat-Capacity and Other Thermodynamic Properties of  
1011 Linear Macromolecules .5. Polystyrene. *J Phys Chem Ref Data.* 11:313-325.
- 1012 Gavrilov, L.R., E.M. Tsurulnikov, and I.A. Davies. 1996. Application of focused ultrasound for the  
1013 stimulation of neural structures. *Ultrasound Med Biol.* 22:179-192.
- 1014 Giese, K.P., J.F. Storm, D. Reuter, N.B. Fedorov, L.R. Shao, T. Leicher, O. Pongs, and A.J. Silva.  
1015 1998. Reduced K<sup>+</sup> channel inactivation, spike broadening, and after-hyperpolarization in  
1016 Kvbeta1.1-deficient mice with impaired learning. *Learn Mem.* 5:257-273.
- 1017 Gonzalez, J.A., L.T. Jensen, S.E. Doyle, M. Miranda-Anaya, M. Menaker, L. Fugger, D.A. Bayliss,  
1018 and D. Burdakov. 2009. Deletion of TASK1 and TASK3 channels disrupts intrinsic  
1019 excitability but does not abolish glucose or pH responses of orexin/hypocretin neurons.  
1020 *Eur J Neurosci.* 30:57-64.
- 1021 Gu, N., K. Vervaeke, and J.F. Storm. 2007. BK potassium channels facilitate high-frequency firing  
1022 and cause early spike frequency adaptation in rat CA1 hippocampal pyramidal cells. *J*  
1023 *Physiol.* 580:859-882.
- 1024 Hand, J.W. 1998. Ultrasound hyperthermia and the prediction of heating. In *Ultrasound in*  
1025 *Medicine*. F. Duck, A. Baker and H. Starritt, editors. Institute of Physics Publishing,  
1026 Philadelphia, PA.
- 1027 Harper, C.A. 2006. Handbook of plastics technologies: the complete guide to properties and  
1028 performance. In. McGraw-Hill, New York, NY.
- 1029 Hille, B. 2001. Ion Channels of Excitable Membranes. 3rd  
1030 .ed. Sinauer Associates, Inc., Sunderland, MA.
- 1031 Kanda, H., J. Ling, S. Tonomura, K. Noguchi, S. Matalon, and J.G. Gu. 2019. TREK-1 and TRAAK  
1032 Are Principal K(+) Channels at the Nodes of Ranvier for Rapid Action Potential  
1033 Conduction on Mammalian Myelinated Afferent Nerves. *Neuron.* 104:960-971 e967.
- 1034 Kang, D., C. Choe, and D. Kim. 2005. Thermosensitivity of the two-pore domain K<sup>+</sup> channels  
1035 TREK-2 and TRAAK. *J Physiol.* 564:103-116.

- 1036 Khaliq, Z.M., and B.P. Bean. 2010. Pacemaking in dopaminergic ventral tegmental area neurons:  
1037 depolarizing drive from background and voltage-dependent sodium conductances. *J*  
1038 *Neurosci.* 30:7401-7413.
- 1039 Kim, J., D.S. Wei, and D.A. Hoffman. 2005. Kv4 potassium channel subunits control action  
1040 potential repolarization and frequency-dependent broadening in rat hippocampal CA1  
1041 pyramidal neurones. *J Physiol.* 569:41-57.
- 1042 King, R.L., J.R. Brown, W.T. Newsome, and K.B. Pauly. 2013. Effective parameters for  
1043 ultrasound-induced in vivo neurostimulation. *Ultrasound Med Biol.* 39:312-331.
- 1044 Kloda, A., L. Lua, R. Hall, D.J. Adams, and B. Martinac. 2007. Liposome reconstitution and  
1045 modulation of recombinant N-methyl-D-aspartate receptor channels by membrane  
1046 stretch. *Proc Natl Acad Sci U S A.* 104:1540-1545.
- 1047 Kole, M.H. 2011. First node of Ranvier facilitates high-frequency burst encoding. *Neuron.*  
1048 71:671-682.
- 1049 Krasovitski, B., V. Frenkel, S. Shoham, and E. Kimmel. 2011. Intramembrane cavitation as a  
1050 unifying mechanism for ultrasound-induced bioeffects. *Proc Natl Acad Sci U S A.*  
1051 108:3258-3263.
- 1052 Kubanek, J., J. Shi, J. Marsh, D. Chen, C. Deng, and J. Cui. 2016. Ultrasound modulates ion  
1053 channel currents. *Sci Rep.* 6:24170.
- 1054 Kwok, R., and E. Evans. 1981. Thermoelasticity of large lecithin bilayer vesicles. *Biophys J.*  
1055 35:637-652.
- 1056 Laitko, U., and C.E. Morris. 2004. Membrane tension accelerates rate-limiting voltage-  
1057 dependent activation and slow inactivation steps in a Shaker channel. *J Gen Physiol.*  
1058 123:135-154.
- 1059 Lee, S.A., H.A.S. Kamimura, M.T. Burgess, and E.E. Konofagou. 2020. Displacement imaging for  
1060 focused ultrasound peripheral nerve neuromodulation. *IEEE Trans Med Imaging.*
- 1061 Leighton, T.G. 1998. An introduction to acoustic cavitation. In *Ultrasound in Medicine*. F. Duck,  
1062 A. Baker and H. Starritt, editors. Institute of Physics Publishing, Philadelphia, PA.
- 1063 Leterrier, C. 2018. The Axon Initial Segment: An Updated Viewpoint. *J Neurosci.* 38:2135-2145.
- 1064 Lien, C.C., and P. Jonas. 2003. Kv3 potassium conductance is necessary and kinetically optimized  
1065 for high-frequency action potential generation in hippocampal interneurons. *J Neurosci.*  
1066 23:2058-2068.
- 1067 Liu, P.W., and B.P. Bean. 2014. Kv2 channel regulation of action potential repolarization and  
1068 firing patterns in superior cervical ganglion neurons and hippocampal CA1 pyramidal  
1069 neurons. *J Neurosci.* 34:4991-5002.
- 1070 Lothet, E.H., K.M. Shaw, H. Lu, J. Zhuo, Y.T. Wang, S. Gu, D.B. Stolz, E.D. Jansen, C.C. Horn, H.J.  
1071 Chiel, and M.W. Jenkins. 2017. Selective inhibition of small-diameter axons using  
1072 infrared light. *Sci Rep.* 7:3275.
- 1073 MacKenzie, G., N.P. Franks, and S.G. Brickley. 2015. Two-pore domain potassium channels  
1074 enable action potential generation in the absence of voltage-gated potassium channels.  
1075 *Pflugers Arch.* 467:989-999.
- 1076 Madison, D.V., and R.A. Nicoll. 1984. Control of the repetitive discharge of rat CA 1 pyramidal  
1077 neurones in vitro. *J Physiol.* 354:319-331.

- 1078 Maingret, F., I. Lauritzen, A.J. Patel, C. Heurteaux, R. Reyes, F. Lesage, M. Lazdunski, and E.  
1079 Honore. 2000. TREK-1 is a heat-activated background K(+) channel. *EMBO J.* 19:2483-  
1080 2491.
- 1081 Malinow, R., and R.W. Tsien. 1990. Presynaptic enhancement shown by whole-cell recordings  
1082 of long-term potentiation in hippocampal slices. *Nature.* 346:177-180.
- 1083 Marinc, C., C. Derst, H. Pruss, and R.W. Veh. 2014. Immunocytochemical localization of TASK-3  
1084 protein (K2P9.1) in the rat brain. *Cell Mol Neurobiol.* 34:61-70.
- 1085 Menz, M.D., O. Oralkan, P.T. Khuri-Yakub, and S.A. Baccus. 2013. Precise neural stimulation in  
1086 the retina using focused ultrasound. *J Neurosci.* 33:4550-4560.
- 1087 Menz, M.D., P. Ye, K. Firouzi, A. Nikoozadeh, K.B. Pauly, P. Khuri-Yakub, and S.A. Baccus. 2019.  
1088 Radiation Force as a Physical Mechanism for Ultrasonic Neurostimulation of the Ex Vivo  
1089 Retina. *J Neurosci.* 39:6251-6264.
- 1090 Mihran, R.T., F.S. Barnes, and H. Wachtel. 1990. Temporally-specific modification of myelinated  
1091 axon excitability in vitro following a single ultrasound pulse. *Ultrasound Med Biol.*  
1092 16:297-309.
- 1093 Min, B.K., A. Bystritsky, K.I. Jung, K. Fischer, Y. Zhang, L.S. Maeng, S.I. Park, Y.A. Chung, F.A.  
1094 Jolesz, and S.S. Yoo. 2011. Focused ultrasound-mediated suppression of chemically-  
1095 induced acute epileptic EEG activity. *BMC Neurosci.* 12:23.
- 1096 Mizrahi, N., E.H. Zhou, G. Lenormand, R. Krishnan, D. Weihs, J.P. Butler, D.A. Weitz, J.J.  
1097 Fredberg, and E. Kimmel. 2012. Low intensity ultrasound perturbs cytoskeleton  
1098 dynamics. *Soft Matter.* 8:2438-2443.
- 1099 Morris, C.E., and P.F. Juranka. 2007. Nav channel mechanosensitivity: activation and  
1100 inactivation accelerate reversibly with stretch. *Biophys J.* 93:822-833.
- 1101 Needham, D., and R.S. Nunn. 1990. Elastic deformation and failure of lipid bilayer membranes  
1102 containing cholesterol. *Biophys J.* 58:997-1009.
- 1103 Oh, S.J., J.M. Lee, H.B. Kim, J. Lee, S. Han, J.Y. Bae, G.S. Hong, W. Koh, J. Kwon, E.S. Hwang, D.H.  
1104 Woo, I. Youn, I.J. Cho, Y.C. Bae, S. Lee, J.W. Shim, J.H. Park, and C.J. Lee. 2020. Ultrasonic  
1105 Neuromodulation via Astrocytic TRPA1. *Curr Biol.* 30:948.
- 1106 Owen, S.F., M.H. Liu, and A.C. Kreitzer. 2019. Thermal constraints on in vivo optogenetic  
1107 manipulations. *Nat Neurosci.* 22:1061-1065.
- 1108 Pan, Z., T. Kao, Z. Horvath, J. Lemos, J.Y. Sul, S.D. Cranstoun, V. Bennett, S.S. Scherer, and E.C.  
1109 Cooper. 2006. A common ankyrin-G-based mechanism retains KCNQ and NaV channels  
1110 at electrically active domains of the axon. *J Neurosci.* 26:2599-2613.
- 1111 Paris, L., I. Marc, B. Charlot, M. Dumas, J. Valmier, and F. Bardin. 2017. Millisecond infrared  
1112 laser pulses depolarize and elicit action potentials on in-vitro dorsal root ganglion  
1113 neurons. *Biomed Opt Express.* 8:4568-4578.
- 1114 Plaksin, M., E. Kimmel, and S. Shoham. 2016. Cell-Type-Selective Effects of Intramembrane  
1115 Cavitation as a Unifying Theoretical Framework for Ultrasonic Neuromodulation.  
1116 *eNeuro.* 3.
- 1117 Prieto, M.L., K. Firouzi, B.T. Khuri-Yakub, and M. Maduke. 2018. Activation of Piezo1 but Not  
1118 NaV1.2 Channels by Ultrasound at 43 MHz. *Ultrasound Med Biol.* 44:1217-1232.
- 1119 Prieto, M.L., O. Oralkan, B.T. Khuri-Yakub, and M.C. Maduke. 2013. Dynamic response of model  
1120 lipid membranes to ultrasonic radiation force. *PLoS One.* 8:e77115.

- 1121 Qiu, Z., J. Guo, S. Kala, J. Zhu, Q. Xian, W. Qiu, G. Li, T. Zhu, L. Meng, R. Zhang, H.C. Chan, H.  
1122 Zheng, and L. Sun. 2019. The Mechanosensitive Ion Channel Piezo1 Significantly  
1123 Mediates In Vitro Ultrasonic Stimulation of Neurons. *iScience*. 21:448-457.
- 1124 Rashid, B., M. Destrade, and M.D. Gilchrist. 2012. Mechanical characterization of brain tissue in  
1125 compression at dynamic strain rates. *J Mech Behav Biomed Mater*. 10:23-38.
- 1126 Rashid, B., M. Destrade, and M.D. Gilchrist. 2013. Mechanical characterization of brain tissue in  
1127 simple shear at dynamic strain rates. *J Mech Behav Biomed Mater*. 28:71-85.
- 1128 Ricca, B.L., G. Venugopalan, and D.A. Fletcher. 2013. To pull or be pulled: parsing the multiple  
1129 modes of mechanotransduction. *Curr Opin Cell Biol*. 25:558-564.
- 1130 Richter, C.P., A.I. Matic, J.D. Wells, E.D. Jansen, and J.T. Walsh, Jr. 2011. Neural stimulation with  
1131 optical radiation. *Laser Photon Rev*. 5:68-80.
- 1132 Sarvazyan, A.P., O.V. Rudenko, and W.L. Nyborg. 2010. Biomedical applications of radiation  
1133 force of ultrasound: historical roots and physical basis. *Ultrasound Med Biol*. 36:1379-  
1134 1394.
- 1135 Schewe, M., E. Nematian-Ardestani, H. Sun, M. Musinszki, S. Cordeiro, G. Bucci, B.L. de Groot,  
1136 S.J. Tucker, M. Rapedius, and T. Baukrowitz. 2016. A Non-canonical Voltage-Sensing  
1137 Mechanism Controls Gating in K2P K(+) Channels. *Cell*. 164:937-949.
- 1138 Seeger, H.M., L. Aldrovandi, A. Alessandrini, and P. Facci. 2010. Changes in single K(+) channel  
1139 behavior induced by a lipid phase transition. *Biophys J*. 99:3675-3683.
- 1140 Selfridge, A.R. 1985. Approximate Material Properties in Isotropic Materials. *Ieee T Son*  
1141 *Ultrason*. 32:381-394.
- 1142 Shah, M.M., M. Migliore, I. Valencia, E.C. Cooper, and D.A. Brown. 2008. Functional significance  
1143 of axonal Kv7 channels in hippocampal pyramidal neurons. *Proc Natl Acad Sci U S A*.  
1144 105:7869-7874.
- 1145 Shao, L.R., R. Halvorsrud, L. Borg-Graham, and J.F. Storm. 1999. The role of BK-type Ca<sup>2+</sup>-  
1146 dependent K<sup>+</sup> channels in spike broadening during repetitive firing in rat hippocampal  
1147 pyramidal cells. *J Physiol*. 521 Pt 1:135-146.
- 1148 Shapiro, M.G., K. Homma, S. Villarreal, C.P. Richter, and F. Bezanilla. 2012. Infrared light excites  
1149 cells by changing their electrical capacitance. *Nat Commun*. 3:736.
- 1150 Tabarean, I.V., and C.E. Morris. 2002. Membrane stretch accelerates activation and slow  
1151 inactivation in Shaker channels with S3-S4 linker deletions. *Biophys J*. 82:2982-2994.
- 1152 Talley, E.M., G. Solorzano, Q. Lei, D. Kim, and D.A. Bayliss. 2001. Cns distribution of members of  
1153 the two-pore-domain (KCNK) potassium channel family. *J Neurosci*. 21:7491-7505.
- 1154 Taverna, S., T. Tkatch, A.E. Metz, and M. Martina. 2005. Differential expression of TASK  
1155 channels between horizontal interneurons and pyramidal cells of rat hippocampus. *J*  
1156 *Neurosci*. 25:9162-9170.
- 1157 Taylor, R.E. 1965. Impedance of the squid axon membrane. *J Cell Comp Physiol*. 66:21-25.
- 1158 Thijssen, J.M., H.J. Mol, and M.R. Timmer. 1985. Acoustic parameters of ocular tissues.  
1159 *Ultrasound Med Biol*. 11:157-161.
- 1160 Tsui, P.H., S.H. Wang, and C.C. Huang. 2005. In vitro effects of ultrasound with different  
1161 energies on the conduction properties of neural tissue. *Ultrasonics*. 43:560-565.
- 1162 Tufail, Y., A. Matyushov, N. Baldwin, M.L. Tauchmann, J. Georges, A. Yoshihiro, S.I. Tillery, and  
1163 W.J. Tyler. 2010. Transcranial pulsed ultrasound stimulates intact brain circuits. *Neuron*.  
1164 66:681-694.



- 1165 Tyler, W.J., S.W. Lani, and G.M. Hwang. 2018. Ultrasonic modulation of neural circuit activity.  
1166 *Curr Opin Neurobiol.* 50:222-231.
- 1167 Tyler, W.J., Y. Tufail, M. Finsterwald, M.L. Tauchmann, E.J. Olson, and C. Majestic. 2008. Remote  
1168 excitation of neuronal circuits using low-intensity, low-frequency ultrasound. *PLoS One.*  
1169 3:e3511.
- 1170 Walsh, A.J., G.P. Tolstykh, S. Martens, B.L. Ibey, and H.T. Beier. 2016. Action potential block in  
1171 neurons by infrared light. *Neurophotonics.* 3:040501.
- 1172 Wang, J., and O.P. Hamill. 2020. Piezo2, a pressure sensitive channel is expressed in select  
1173 neurons of  
1174 the mouse brain: a putative mechanism for synchronizing neural  
1175 networks by transducing intracranial pressure pulses. *bioRxiv.*
- 1176 Wells, J., C. Kao, P. Konrad, T. Milner, J. Kim, A. Mahadevan-Jansen, and E.D. Jansen. 2007.  
1177 Biophysical mechanisms of transient optical stimulation of peripheral nerve. *Biophys J.*  
1178 93:2567-2580.
- 1179 White, S.H., and T.E. Thompson. 1973. Capacitance, area, and thickness variations in thin lipid  
1180 films. *Biochim Biophys Acta.* 323:7-22.
- 1181 Wu, J., and W.L. Nyborg. 2008. Ultrasound, cavitation bubbles and their interaction with cells.  
1182 *Adv Drug Deliv Rev.* 60:1103-1116.
- 1183 Yamada-Hanff, J., and B.P. Bean. 2015. Activation of Ih and TTX-sensitive sodium current at  
1184 subthreshold voltages during CA1 pyramidal neuron firing. *J Neurophysiol.* 114:2376-  
1185 2389.
- 1186 Ye, P.P., J.R. Brown, and K.B. Pauly. 2016. Frequency Dependence of Ultrasound  
1187 Neurostimulation in the Mouse Brain. *Ultrasound Med Biol.* 42:1512-1530.
- 1188 Yoo, S., D.R. Mittelstein, R. Hurt, J. Lacroix, and M.G. Shapiro. 2020. Focused ultrasound excites  
1189 neurons via mechanosensitive calcium accumulation and ion channel amplification.  
1190 *bioRxiv.*
- 1191 Young, R.R., and E. Henneman. 1961. Functional effects of focused ultrasound on mammalian  
1192 nerves. *Science.* 134:1521-1522.
- 1193 Yue, C., and Y. Yaari. 2004. KCNQ/M channels control spike afterdepolarization and burst  
1194 generation in hippocampal neurons. *J Neurosci.* 24:4614-4624.
- 1195 Zachs, D.P., S.J. Offutt, R.S. Graham, Y. Kim, J. Mueller, J.L. Auger, N.J. Schuldt, C.R.W. Kaiser,  
1196 A.P. Heiller, R. Dutta, H. Guo, J.K. Alford, B.A. Binstadt, and H.H. Lim. 2019. Noninvasive  
1197 ultrasound stimulation of the spleen to treat inflammatory arthritis. *Nat Commun.*  
1198 10:951.
- 1199 Zhou, D., S. Lambert, P.L. Malen, S. Carpenter, L.M. Boland, and V. Bennett. 1998. AnkyrinG is  
1200 required for clustering of voltage-gated Na channels at axon initial segments and for  
1201 normal action potential firing. *J Cell Biol.* 143:1295-1304.
- 1202 Zhu, X., J.W. Lin, and M.Y. Sander. 2019. Infrared inhibition and waveform modulation of action  
1203 potentials in the crayfish motor axon. *Biomed Opt Express.* 10:6580-6594.
- 1204

1205

1206 **SUPPLEMENTAL MATERIALS**

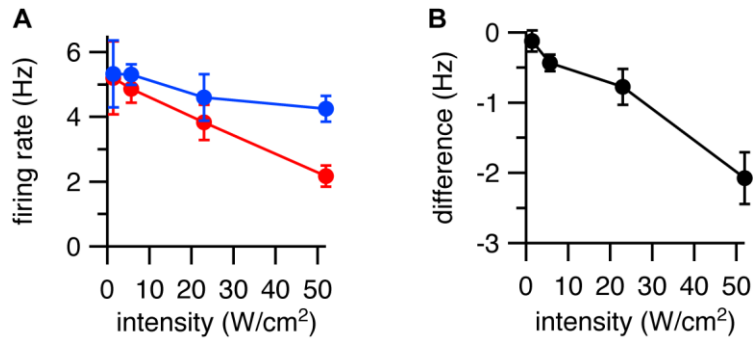

1207

1208 **Supplemental Figure 1. Effects of ultrasound at different intensities on firing rate. A.** Mean ( $\pm$   
1209 SEM) action potential firing rate with (*red*) or without (*blue*) a 1-s ultrasound pulse at various  
1210 intensities starting 200 ms after the start of a 2-s current step, as measured during the period of  
1211 overlap between the ultrasound and current stimuli, or during the same time period in the  
1212 absence of ultrasound. N = 4 cells, except for 6 W/cm<sup>2</sup>, where N = 3 cells. **B.** As in panel A, but  
1213 showing the difference in firing rate between the ultrasound and control conditions.

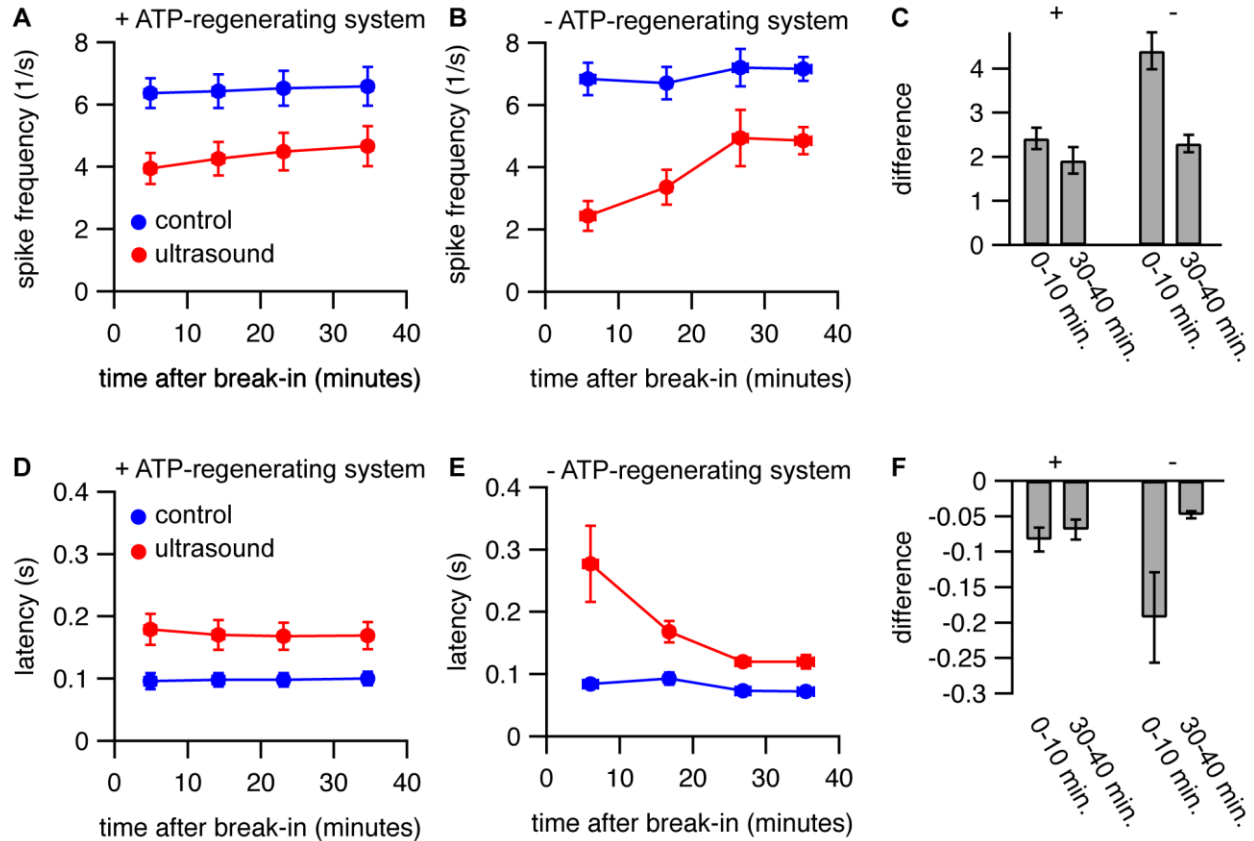

1214

1215 **Supplemental Figure 2. An ATP-regenerating internal solution stabilizes the response to**

1216 **ultrasound. A-B.** Mean ( $\pm$ SEM) spike rates during the first 500 ms of a current step in the

1217 presence (*red circles*) and absence (*blue circles*) of a 1-s ultrasound application starting 500 ms

1218 before the current step, as a function of time relative to break-in (establishment of whole-cell

1219 recording configuration). The internal solution contained 10 Na-phosphocreatine with (A) or

1220 without (B) 50 U/mL creatine phosphokinase to provide an ATP-regenerating system. Spike

1221 rates were measured at various time points between 0 and 10, 10 and 20, 20 and 30, and 30

1222 and 40 minutes after break-in. The x-values represent the mean start time for the protocol to

1223 measure spike rates (which comprised 2 minutes of recording time) with horizontal error bars

1224 (in some cases smaller than the symbol size) representing the SEM. The amplitude of the

1225 current step was adjusted over time to maintain spiking behavior as close as possible to that at



1226 the start of the experiment. **C.** Mean ( $\pm$ SEM) difference in spike rate between the control and  
1227 ultrasound conditions for measurements at 1-10 minutes after break-in and 30-40 minutes  
1228 after break-in, with (*left*) or without (*right*) the ATP-regenerating system. The difference was  
1229 only statistically significant without the ATP-regenerating system ( $P = 0.11$ , with; and  $P =$   
1230  $0.0064$ , without). **D-F.** Same as A-B, but for latency to the first action potential following the  
1231 start of the current step.  $N = 10$  cells with and  $N = 6$  cells without the ATP-regenerating system.  
1232 The difference was not statistically significant for either group ( $P = 0.21$ , with; and  $P = 0.089$ ,  
1233 without).  
1234

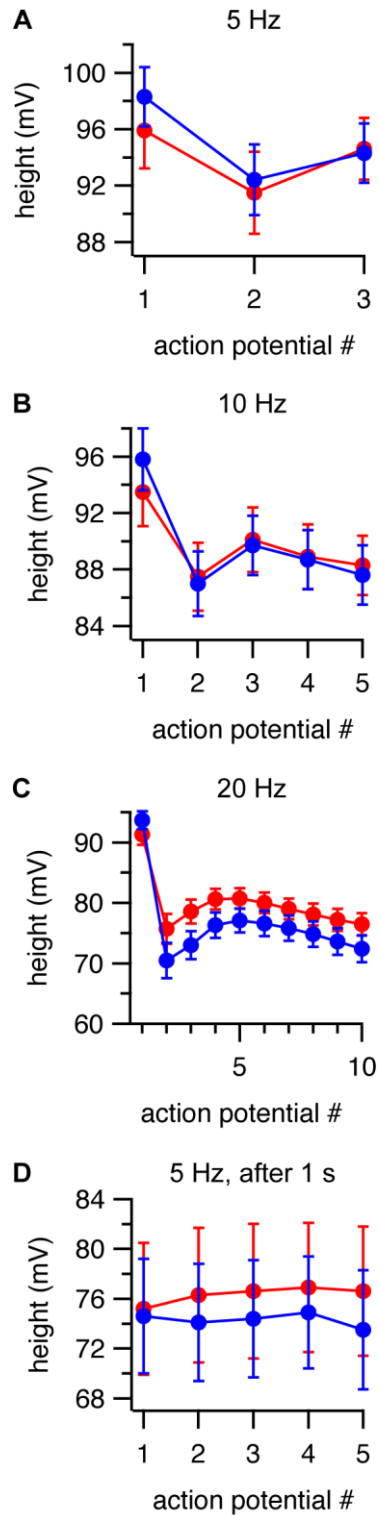

1235

1236 **Supplemental Figure 3. Effects of ultrasound on action potential height. A-C.** Mean ( $\pm$ SEM)

1237 action potential heights as a function of action potential number in the presence (*red*) and

1238 absence (*blue*) of a 1-s ultrasound pulse starting 500 ms before the current step, for cells firing  
1239 at an average firing rates (as measured during the first 500 ms of the current step) of  
1240 approximately 5 Hz (N = 13), 10 Hz (N = 15), and 20 Hz (N = 13) in the control condition. **D.** As in  
1241 A-C, but with ultrasound applied 1 s after the start of a 3-s current step, for cells firing at an  
1242 average firing rate of approximately 5 Hz in the control condition, with firing rate determined in  
1243 a 1-s window starting 1 s after the current step (corresponding to the time period of the  
1244 ultrasound stimulus), and action potential number relative to the start of the ultrasound  
1245 stimulus (N = 6). Note that the y-axes do not begin at zero.  
1246

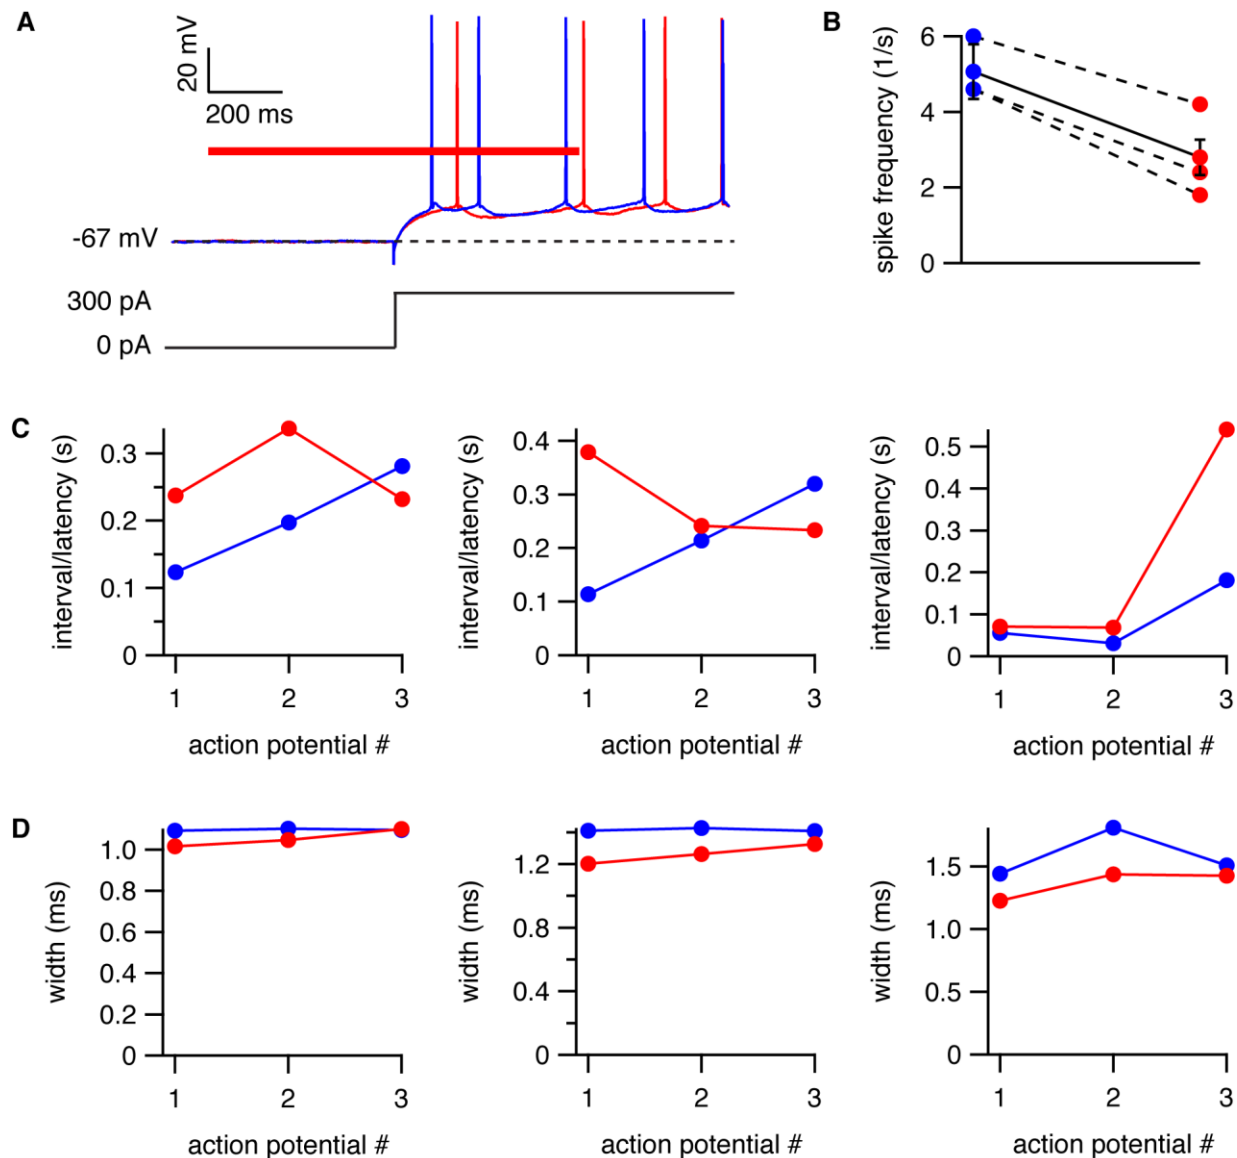

1247

1248 **Supplemental Figure 4. Effects of ultrasound on action potential firing and waveform at near-**  
 1249 **physiological temperature. A.** Example voltage traces showing inhibition of action potential  
 1250 firing by ultrasound at 30°C. The response to a 300-pA current step is shown with (*red voltage*  
 1251 *trace*) and without (*blue voltage trace*) a 1-s ultrasound pulse (*red bar*) applied 500 ms before  
 1252 the start of the current step. The *dashed line* indicates the resting membrane voltage. **B.** Mean  
 1253 ( $\pm$  SEM, N =3) spike frequency during the first 500 ms of the current step (corresponding to the  
 1254 period of overlap between the current and ultrasound stimuli, or the equivalent time period in  
 1255 the absence of ultrasound) for the protocol shown in panel A for the control (*blue*) and  
 1256 ultrasound (*red*) conditions, for cells firing at an average spike frequency of approximately 5 Hz  
 1257 in the absence of ultrasound. Data points for the individual cells are shown connected by  
 1258 *dashed lines*. (Compare Figure 1E.) **C.** Latency between the start of the current step and the first  
 1259 action potential, and between the first and second, and second and third action potentials,  
 1260 for the control (*blue*) and ultrasound (*red*) conditions for three individual cells. (Compare Figure

1261 4A.) **D.** As in panel C, but for effects of ultrasound on action potential width. (Compare Figure  
1262 6A.)
